# Supplementary material for: A ligand-free strategy for the copper-catalysed direct alkynylation of trifluoromethyl ketones
Source: Royal Society of Chemistry journal article supplement (doi:10.1039/c4ra14322a), 2015-01-01

*Supporting information for*

**A ligand-free strategy for the copper-catalyzed direct  
alkynylation of trifluoromethyl ketones**

Lei Wang, Ning Liu,\* Bin Dai,\* Xiaowei Ma and Lei Shi

*School of Chemistry and Chemical Engineering, the Key Laboratory for Green Processing of  
Chemical Engineering of Xinjiang Bingtuan, Shihezi University, North 4th Road, Shihezi, Xinjiang  
832003, China*

Fax.: (+0086)-0993-205-7270; phone: (+0086)-0993-205-7277; e-mail: ninglau@163.com  
(N. Liu) ; dbinly@126.com (B. Dai)

**Contents**

|                                      |         |
|--------------------------------------|---------|
| Table S1                             | S2      |
| Figure S1-S4                         | S3-S4   |
| Experimental Section                 | S5-S6   |
| Characterization Data                | S7-S12  |
| Cited References for Known Compounds | S13     |
| NMR Spectra for Products             | S14-S42 |

Table S1 Optimization of alkynylation<sup>[a]</sup>

| Entry             | Solvent                          | <i>T</i> (°C) | Base                           | Catalyst                                        | Yield <sup>[b]</sup> (%) |
|-------------------|----------------------------------|---------------|--------------------------------|-------------------------------------------------|--------------------------|
| 1                 | DMF                              | 70            | KO <i>t</i> -Bu                | CuI                                             | 35                       |
| 2                 | DMA                              | 70            | KO <i>t</i> -Bu                | CuI                                             | 15                       |
| 3                 | NMP                              | 70            | KO <i>t</i> -Bu                | CuI                                             | 29                       |
| 4                 | THF                              | 70            | KO <i>t</i> -Bu                | CuI                                             | 4                        |
| 5                 | Toluene                          | 70            | KO <i>t</i> -Bu                | CuI                                             | 5                        |
| 6                 | C <sub>2</sub> H <sub>5</sub> OH | 70            | KO <i>t</i> -Bu                | CuI                                             | 3                        |
| 7                 | <i>i</i> -PrOH                   | 70            | KO <i>t</i> -Bu                | CuI                                             | 22                       |
| 8                 | Glycerol                         | 70            | KO <i>t</i> -Bu                | CuI                                             | trace                    |
| 9                 | H <sub>2</sub> O                 | 70            | KO <i>t</i> -Bu                | CuI                                             | trace                    |
| 10                | DMSO                             | 70            | KO <i>t</i> -Bu                | CuI                                             | 97                       |
| 11                | DMF                              | 70            | K <sub>2</sub> CO <sub>3</sub> | CuI                                             | 78                       |
| 12                | DMA                              | 70            | K <sub>2</sub> CO <sub>3</sub> | CuI                                             | 85                       |
| 13                | NMP                              | 70            | K <sub>2</sub> CO <sub>3</sub> | CuI                                             | 65                       |
| 14                | THF                              | 70            | K <sub>2</sub> CO <sub>3</sub> | CuI                                             | trace                    |
| 15                | Toluene                          | 70            | K <sub>2</sub> CO <sub>3</sub> | CuI                                             | 6                        |
| 16                | C <sub>2</sub> H <sub>5</sub> OH | 70            | K <sub>2</sub> CO <sub>3</sub> | CuI                                             | 5                        |
| 17                | <i>i</i> -PrOH                   | 70            | K <sub>2</sub> CO <sub>3</sub> | CuI                                             | 19                       |
| 18                | Glycerol                         | 70            | K <sub>2</sub> CO <sub>3</sub> | CuI                                             | trace                    |
| 19                | H <sub>2</sub> O                 | 70            | K <sub>2</sub> CO <sub>3</sub> | CuI                                             | trace                    |
| 20                | DMSO                             | 50            | K <sub>2</sub> CO <sub>3</sub> | FeCl <sub>3</sub>                               | 0                        |
| 21                | DMSO                             | 50            | K <sub>2</sub> CO <sub>3</sub> | FeSO <sub>4</sub>                               | 0                        |
| 22                | DMSO                             | 50            | K <sub>2</sub> CO <sub>3</sub> | Fe(NO <sub>3</sub> ) <sub>2</sub>               | 0                        |
| 23                | DMSO                             | 50            | K <sub>2</sub> CO <sub>3</sub> | AlCl <sub>3</sub>                               | 0                        |
| 24                | DMSO                             | 50            | K <sub>2</sub> CO <sub>3</sub> | Al <sub>2</sub> (SO <sub>4</sub> ) <sub>3</sub> | 0                        |
| 25                | DMSO                             | 50            | K <sub>2</sub> CO <sub>3</sub> | MgCl <sub>2</sub>                               | 0                        |
| 26                | DMSO                             | 50            | K <sub>2</sub> CO <sub>3</sub> | BF <sub>3</sub>                                 | 0                        |
| 27 <sup>[c]</sup> | DMSO                             | 50            | K <sub>2</sub> CO <sub>3</sub> | CuI                                             | 90                       |
| 28 <sup>[d]</sup> | DMSO                             | 50            | K <sub>2</sub> CO <sub>3</sub> | CuI                                             | 96                       |
| 29 <sup>[e]</sup> | DMSO                             | 50            | K <sub>2</sub> CO <sub>3</sub> | CuI                                             | 72                       |

[a] Reaction conditions: 2,2,2-trifluoroacetophenone (0.5 mmol), phenylacetylene (1.0 mmol), Cu source (10 mol%), base (20 mol%) in solvent (1 mL) under N<sub>2</sub>, 24 h. [b] Isolated yield. [c] In air. [d] phenylacetylene (1.5 equiv.). [e] phenylacetylene (1.2 equiv.).

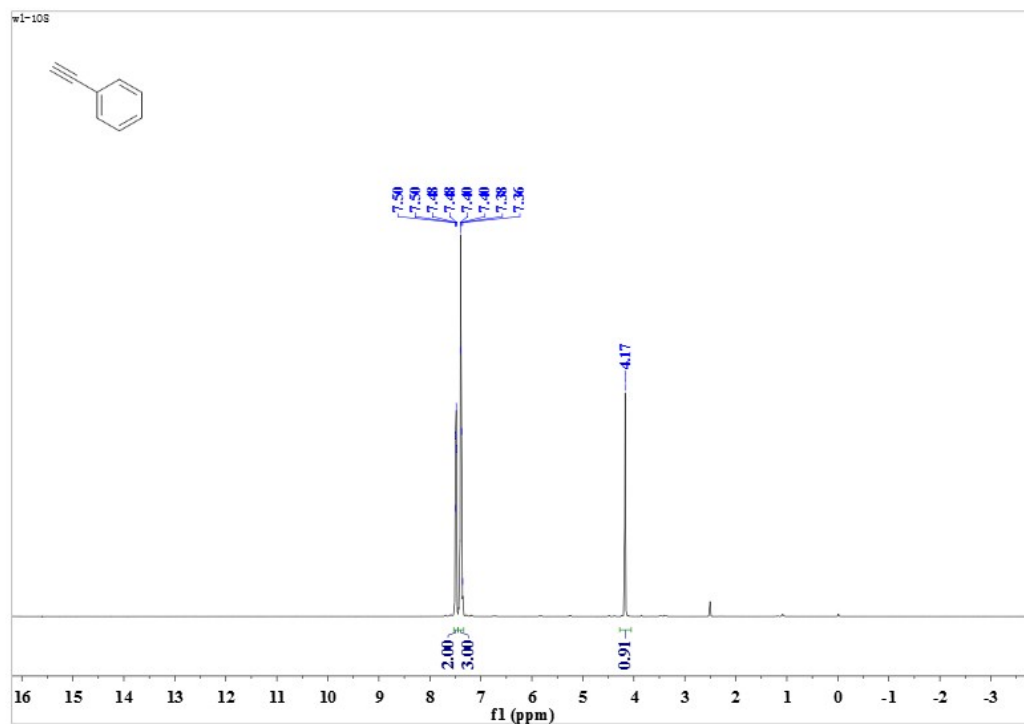

**Figure S1.**  $^1\text{H}$  NMR of phenylacetylene in  $\text{DMSO-}d_6$ .

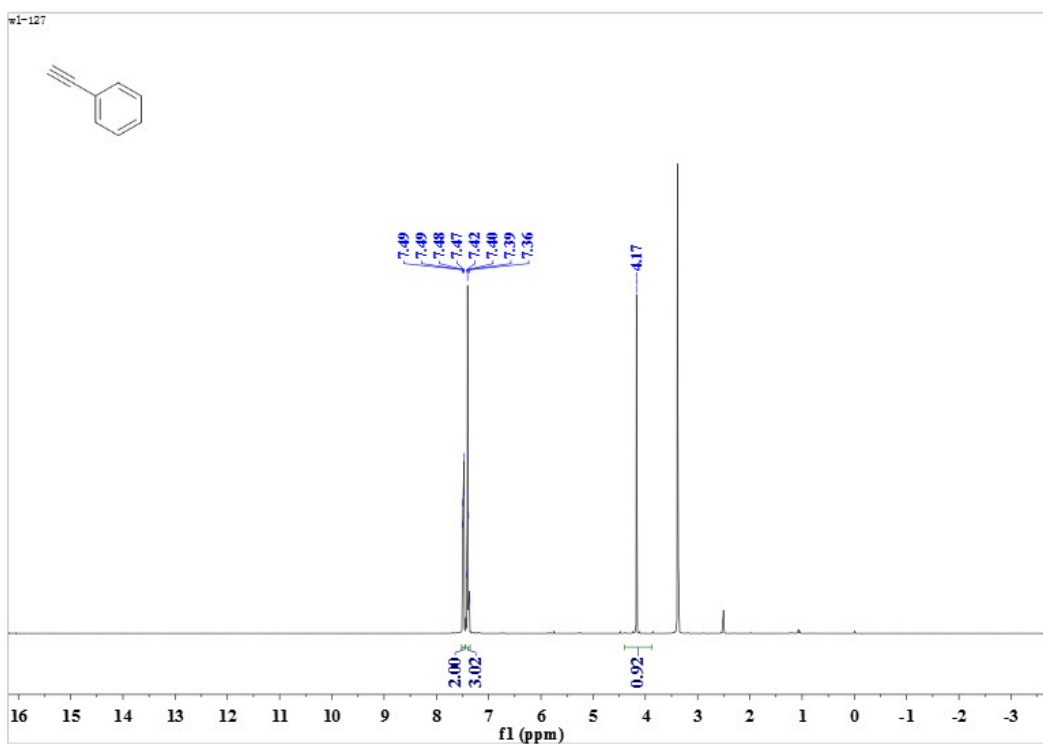

**Figure S2.**  $^1\text{H}$  NMR of phenylacetylene in  $\text{DMSO-}d_6$ . Reaction condition: a mixture of phenylacetylene (1.0 mmol) and  $\text{K}_2\text{CO}_3$  (1.0 mmol) in 1 mL  $\text{DMSO-}d_6$  was allowed to react in Schlenk tubes for 24 h under nitrogen atmosphere.

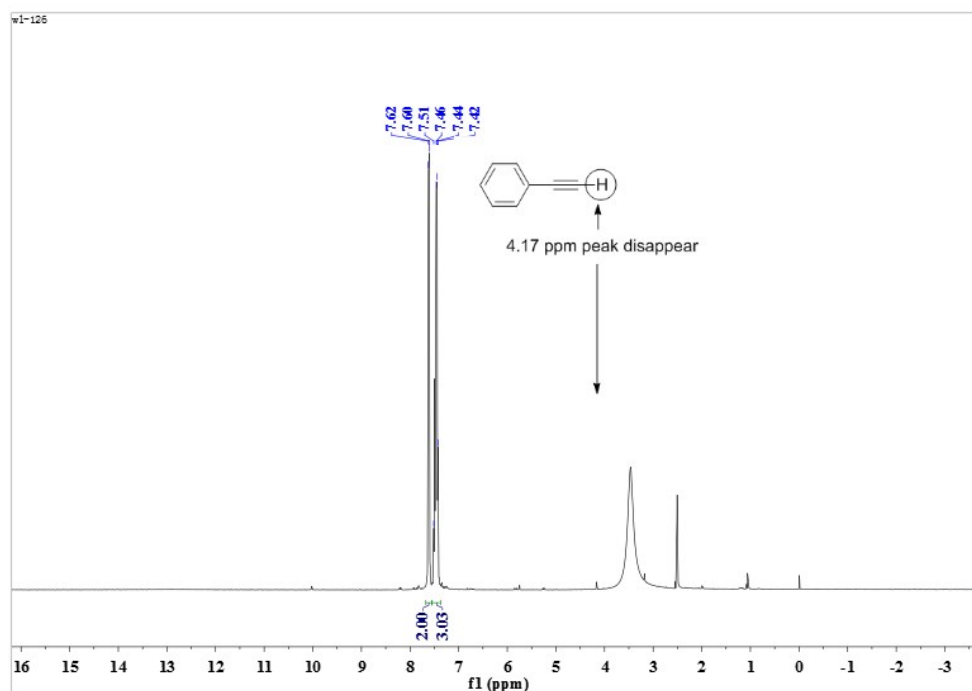

**Figure S3.**  $^1\text{H}$  NMR of phenylacetylene in  $\text{DMSO}-d_6$ . Reaction condition: a mixture of phenylacetylene (1.0 mmol),  $\text{K}_2\text{CO}_3$  (1.0 mmol), and  $\text{Cu}(\text{OAc})_2$  (1.0 mmol) in 1 mL  $\text{DMSO}-d_6$  was allowed to react in Schlenk tubes for 24 h under nitrogen atmosphere.

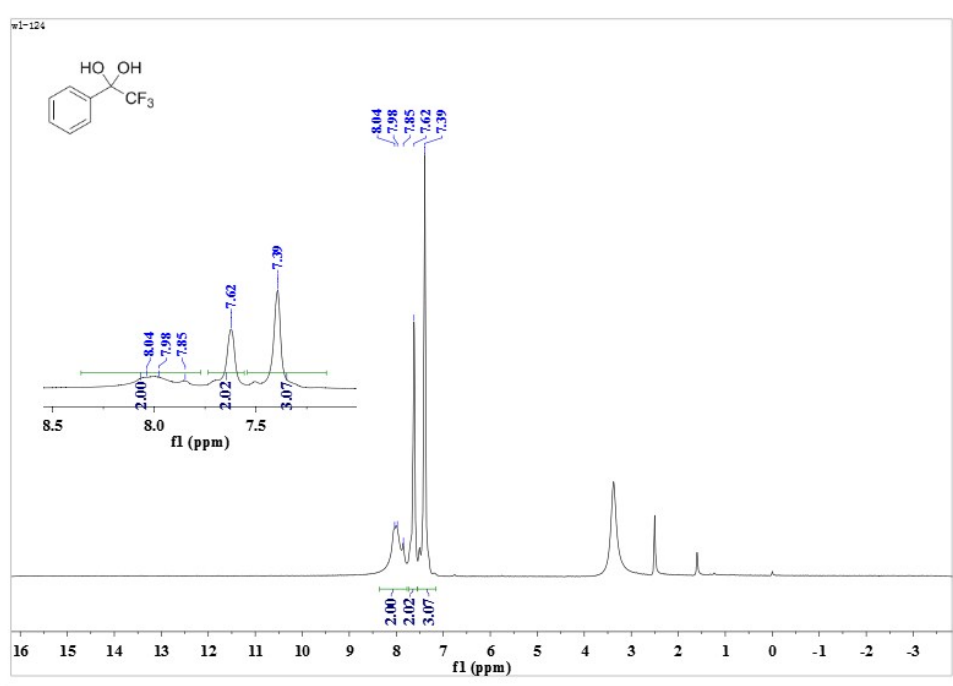

**Figure S4.**  $^1\text{H}$  NMR of 2,2,2-trifluoro-1-phenylethane-1,1-diol in  $\text{DMSO}-d_6$ . Reaction condition: a mixture of 2,2,2-trifluoroacetophenone (1.0 mmol),  $\text{K}_2\text{CO}_3$  (1.0 mmol), and  $\text{Cu}(\text{OAc})_2$  (1.0 mmol) in 1 mL  $\text{DMSO}-d_6$  was allowed to react in Schlenk tubes for 24 h under nitrogen atmosphere.

## **Experimental Section**

### **General Experimental Methods**

All reactions were carried out in Schlenk tubes under an atmosphere of nitrogen. DMSO (dimethyl sulfoxide) was distilled from 4Å-molecular sieves. Trifluoromethyl ketones and other reagents were purchased from Alfa Aesar, Acros, and Adamas.  $^1\text{H}$  NMR spectra (400 MHz) and  $^{13}\text{C}$  NMR spectra (100 MHz) were recorded on a Varian Inova-400 spectrometer using TMS as internal standard.  $^{19}\text{F}$  NMR spectra (376 MHz) were recorded on a Varian Inova-400 spectrometer using  $\text{CF}_3\text{COOH}$  as internal standard. Mass spectroscopy data of the compounds were collected on a Bruker ultrafleXtreme mass spectrometer. All products were isolated by short chromatography on a silica gel (300–400 mesh) column.

### **General Procedure for Optimization of Reaction Condition**

A mixture of 2,2,2-trifluoroacetophenone (0.5 mmol), phenylacetylene (1.0 mmol), Cu source (0.05 mmol), and base (0.1 mmol) in solvent (1 mL) was allowed to react in Schlenk tubes for 24 h under nitrogen atmosphere. After reaction, the reaction mixture was added to brine (15 mL) and extracted three times with dichloromethane ( $3 \times 15$  mL). The solvent was concentrated under vacuum and the product was isolated by short chromatography on a silica gel (300–400 mesh) column.

### **General Procedure for Testing of Scope**

A mixture of ketone (0.5 mmol), alkyne (0.75 mmol),  $\text{Cu}(\text{OAc})_2$  (0.05 mmol), and  $\text{K}_2\text{CO}_3$  (0.1 mmol) in DMSO (1 mL) was allowed to react in Schlenk tubes at 50 °C or 70 °C for 24 h under nitrogen atmosphere. After reaction, the reaction mixture was added to brine (15 mL) and extracted three times with dichloromethane ( $3 \times 15$  mL). The solvent was concentrated under vacuum and the product was isolated by short chromatography on a silica gel (300–400 mesh) column.

**General Procedure for Scaled reaction**

A mixture of 2,2,2-trifluoroacetophenone (5 mmol), cyclopropyl acetylene (7.5 mmol), Cu(OAc)<sub>2</sub> (0.5 mmol), and K<sub>2</sub>CO<sub>3</sub> (1 mmol) in DMSO (10 mL) was allowed to react in Schlenk tubes at 50 °C for 24 h. After reaction, the reaction mixture was added to brine (100 mL) and extracted three times with dichloromethane (3×100 mL). The solvent was concentrated under vacuum and the product was isolated by short chromatography on a silica gel (300–400 mesh) column.

## Characterization Data of Products

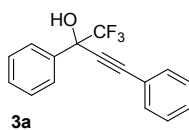

**3a**  
1,1,1-trifluoro-2,4-diphenylbut-3-yn-2-ol [1]

Purification by flash chromatography (petroleum ether/EtOAc = 10:1): a pale yellow oil (133 mg, 96%);  $^1\text{H}$  NMR (400 MHz, DMSO- $d_6$ ):  $\delta$  8.00 (d,  $J$  = 4.0 Hz, 1H), 7.84-7.82 (m, 2H), 7.60 (d,  $J$  = 3.2 Hz, 2H), 7.52-7.44 (m, 6H), ppm;  $^{13}\text{C}$  NMR (100 MHz, DMSO- $d_6$ ):  $\delta$  137.15, 132.11, 130.05, 129.67, 129.26, 128.60, 127.55, 122.83 (t,  $J_{\text{C-F}}$  = 284.0 Hz), 119.98, 86.94, 86.15, 72.43 (q,  $J_{\text{C-F}}$  = 31.0 Hz), ppm;  $^{19}\text{F}$  NMR (376 MHz, DMSO- $d_6$ ):  $\delta$  -0.86, ppm.

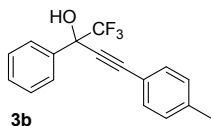

**3b**  
1,1,1-trifluoro-2-phenyl-4-(p-tolyl)but-3-yn-2-ol [2]

Purification by flash chromatography (petroleum ether/EtOAc = 10:1): a pale yellow oil (133 mg, 91%);  $^1\text{H}$  NMR (400 MHz, DMSO- $d_6$ ):  $\delta$  7.93 (d,  $J$  = 2.0 Hz, 1H), 7.81 (d,  $J$  = 6.0 Hz, 2H), 7.48 (d,  $J$  = 7.2 Hz, 5H), 7.26 (d,  $J$  = 7.2 Hz, 2H), 2.34 (s, 3H), ppm;  $^{13}\text{C}$  NMR (100 MHz, DMSO- $d_6$ ):  $\delta$  139.98, 137.24, 132.03, 129.88, 129.64, 128.58, 127.54, 122.84 (t,  $J_{\text{C-F}}$  = 284.0 Hz), 118.08, 87.10, 85.51, 72.56 (q,  $J_{\text{C-F}}$  = 31.0 Hz), 21.44, ppm;  $^{19}\text{F}$  NMR (376 MHz, DMSO- $d_6$ ):  $\delta$  -0.85, ppm.

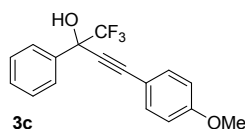

**3c**  
1,1,1-trifluoro-4-(4-methoxyphenyl)-2-phenylbut-3-yn-2-ol [1]

Purification by flash chromatography (petroleum ether/EtOAc = 10:1): a white solid (148 mg, 96%), mp = 94-95 °C;  $^1\text{H}$  NMR (400 MHz, DMSO- $d_6$ ):  $\delta$  7.85 (s, 1H), 7.77 (d,  $J$  = 2.0 Hz, 2H), 7.49 (d,  $J$  = 8.4 Hz, 5H), 7.00 (d,  $J$  = 2.0 Hz, 2H), 3.80 (s, 3H), ppm;  $^{13}\text{C}$  NMR (100 MHz, DMSO- $d_6$ ):  $\delta$  160.57, 137.28, 133.78, 129.63, 128.59, 127.54, 122.84 (t,  $J_{\text{C-F}}$  = 284.0 Hz), 114.93, 112.89, 87.07, 84.72, 72.52 (q,  $J_{\text{C-F}}$  = 31.0 Hz), 55.75, ppm;  $^{19}\text{F}$  NMR (376 MHz, DMSO- $d_6$ ):  $\delta$  -0.83, ppm.

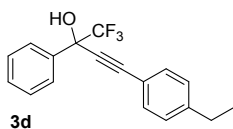

**3d**  
4-(4-ethylphenyl)-1,1,1-trifluoro-2-phenylbut-3-yn-2-ol

Purification by flash chromatography (petroleum ether/EtOAc = 10:1): a pale yellow oil (135 mg, 89%);  $^1\text{H}$  NMR (400 MHz, DMSO- $d_6$ ):  $\delta$  7.94 (s, 1H), 7.81 (d,  $J$  = 7.2

Hz, 2H), 7.51-7.43 (m, 5H), 7.29 (d,  $J = 8.0$  Hz, 2H), 2.64 (q,  $J = 7.6$  Hz, 2H), 1.18 (t,  $J = 7.6$  Hz, 3H), ppm;  $^{13}\text{C}$  NMR (100 MHz, DMSO- $d_6$ ):  $\delta$  146.13, 137.23, 132.12, 129.63, 128.69, 128.57, 127.54, 122.83 (t,  $J_{\text{C-F}} = 284.0$  Hz), 118.33, 87.10, 85.51, 72.55 (q,  $J_{\text{C-F}} = 31.0$  Hz), 28.53, 15.59, ppm;  $^{19}\text{F}$  NMR (376 MHz, DMSO- $d_6$ ):  $\delta$  -0.89, ppm; HRMS (MALDI):  $m/z$  calcd for  $\text{C}_{18}\text{H}_{15}\text{F}_3\text{O}$   $[\text{M}+\text{H}-\text{H}_2\text{O}]^+$  287.1042, found 287.1042.

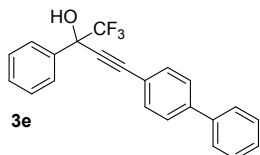

**4-([1,1'-biphenyl]-4-yl)-1,1,1-trifluoro-2-phenylbut-3-yn-2-ol**

Purification by flash chromatography (petroleum ether/EtOAc = 10:1): a white solid (162 mg, 92%), mp = 124-125 °C;  $^1\text{H}$  NMR (400 MHz, DMSO- $d_6$ ):  $\delta$  7.96 (s, 1H), 7.79-7.76 (m, 4H), 7.72 (d,  $J = 7.2$  Hz, 2H), 7.66 (d,  $J = 8.4$  Hz, 2H), 7.52-7.46 (m, 5H), 7.41 (d,  $J = 7.2$  Hz, 1H), ppm;  $^{13}\text{C}$  NMR (100 MHz, DMSO- $d_6$ ):  $\delta$  141.58, 139.34, 137.04, 132.75, 129.76, 129.52, 128.67, 128.55, 127.53, 127.49, 127.17, 122.78 (t,  $J_{\text{C-F}} = 284.0$  Hz), 109.99, 86.77, 86.72, 72.39 (t,  $J_{\text{C-F}} = 31.0$  Hz), ppm;  $^{19}\text{F}$  NMR (376 MHz, DMSO- $d_6$ ):  $\delta$  -0.78, ppm; HRMS (MALDI):  $m/z$  calcd for  $\text{C}_{22}\text{H}_{15}\text{F}_3\text{O}$   $[\text{M}+\text{H}-\text{H}_2\text{O}]^+$  335.1042, found 335.1042.

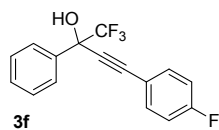

**1,1,1-trifluoro-4-(4-fluorophenyl)-2-phenylbut-3-yn-2-ol** [1]

Purification by flash chromatography (petroleum ether/EtOAc = 10:1): a pale yellow oil (128 mg, 87%);  $^1\text{H}$  NMR (400 MHz, DMSO- $d_6$ ):  $\delta$  7.95 (s, 1H), 7.78 (d,  $J = 7.2$  Hz, 2H), 7.65 (t,  $J = 7.2$  Hz, 2H), 7.51-7.44 (m, 3H), 7.30 (t,  $J = 8.8$  Hz, 2H), ppm;  $^{13}\text{C}$  NMR (100 MHz, DMSO- $d_6$ ):  $\delta$  164.20, 161.73, 137.00, 134.66, 134.57, 129.72, 128.63, 127.52, 122.75 (t,  $J_{\text{C-F}} = 284.0$  Hz), 117.49, 117.46, 116.74, 116.51, 85.92, 85.86, 72.52 (q,  $J_{\text{C-F}} = 31.0$  Hz), ppm;  $^{19}\text{F}$  NMR (376 MHz, DMSO- $d_6$ ):  $\delta$  -0.84, -30.90 – -30.97 (m), ppm.

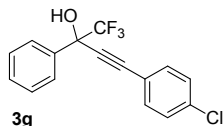

**4-(4-chlorophenyl)-1,1,1-trifluoro-2-phenylbut-3-yn-2-ol** [2]

Purification by flash chromatography (petroleum ether/EtOAc = 10:1): a pale yellow oil (101 mg, 65%);  $^1\text{H}$  NMR (400 MHz, DMSO- $d_6$ ):  $\delta$  8.02 (s, 1H), 7.80 (d,  $J = 8.0$  Hz, 2H), 7.63-7.60 (m, 2H), 7.54-7.44 (m, 5H), ppm;  $^{13}\text{C}$  NMR (100 MHz, DMSO- $d_6$ ):  $\delta$  136.66, 134.71, 133.64, 129.49, 129.25, 128.39, 127.27, 123.90 (d,  $J_{\text{C-F}} = 285.0$  Hz), 119.64, 86.87, 85.53, 72.31 (q,  $J_{\text{C-F}} = 31.0$  Hz), ppm;  $^{19}\text{F}$  NMR (376 MHz,

DMSO-*d*<sub>6</sub>):  $\delta$  -0.82, ppm.

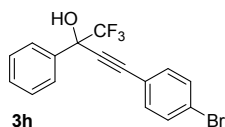

**4-(4-bromophenyl)-1,1,1-trifluoro-2-phenylbut-3-yn-2-ol**

Purification by flash chromatography (petroleum ether/EtOAc = 10:1): a pale yellow oil (137 mg, 77%); <sup>1</sup>H NMR (400 MHz, DMSO-*d*<sub>6</sub>):  $\delta$  8.00 (s, 1H), 7.79 (d, *J* = 7.2 Hz, 2H), 7.67 (d, *J* = 8.0 Hz, 2H), 7.55-7.44 (m, 5H), ppm; <sup>13</sup>C NMR (100 MHz, DMSO-*d*<sub>6</sub>):  $\delta$  136.87, 134.04, 132.40, 129.76, 128.65, 127.51, 123.68, 122.69 (t, *J*<sub>C-F</sub> = 284.0 Hz), 120.24, 87.24, 85.87, 72.58 (q, *J*<sub>C-F</sub> = 31.0 Hz), ppm; <sup>19</sup>F NMR (376 MHz, DMSO-*d*<sub>6</sub>):  $\delta$  -0.79, ppm; HRMS (MALDI): *m/z* calcd for C<sub>16</sub>H<sub>10</sub>BrF<sub>3</sub>O [M+H-H<sub>2</sub>O]<sup>+</sup> 336.9834, found 336.9831.

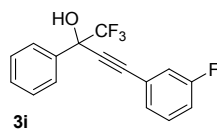

**1,1,1-trifluoro-4-(3-fluorophenyl)-2-phenylbut-3-yn-2-ol**

Purification by flash chromatography (petroleum ether/EtOAc = 10:1): a pale yellow oil (93 mg, 63%); <sup>1</sup>H NMR (400 MHz, DMSO-*d*<sub>6</sub>):  $\delta$  8.00 (s, 1H), 7.78 (d, *J* = 7.2 Hz, 2H), 7.54-7.42 (m, 6H), 7.36 (t, *J* = 8.4 Hz, 1H), ppm; <sup>13</sup>C NMR (100 MHz, DMSO-*d*<sub>6</sub>):  $\delta$  163.48, 161.04, 136.81, 131.59, 131.51, 129.79, 128.68, 128.61, 128.58, 127.52, 122.95, 122.86, 122.69 (t, *J*<sub>C-F</sub> = 284.0 Hz), 118.87, 118.64, 117.65, 117.44, 86.97, 85.59, 85.55, 72.53 (q, *J*<sub>C-F</sub> = 31.0 Hz), ppm; <sup>19</sup>F NMR (376 MHz, DMSO-*d*<sub>6</sub>):  $\delta$  -0.78, -33.86 – -33.92 (m), ppm; HRMS (MALDI): *m/z* calcd for C<sub>16</sub>H<sub>10</sub>F<sub>4</sub>O [M+H-H<sub>2</sub>O]<sup>+</sup> 277.0635, found 277.0635.

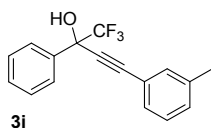

**1,1,1-trifluoro-2-phenyl-4-(*m*-tolyl)but-3-yn-2-ol** [2]

Purification by flash chromatography (petroleum ether/EtOAc = 10:1): a pale yellow oil (142 mg, 97%); <sup>1</sup>H NMR (400 MHz, DMSO-*d*<sub>6</sub>):  $\delta$  7.96 (s, 1H), 7.81 (d, *J* = 7.2 Hz, 2H), 7.52-7.44 (m, 3H), 7.42-7.27 (m, 4H), 2.33 (s, 3H), ppm; <sup>13</sup>C NMR (100 MHz, DMSO-*d*<sub>6</sub>):  $\delta$  138.50, 136.92, 132.25, 130.57, 129.42, 128.93, 128.91, 128.35, 127.29, 122.57 (t, *J*<sub>C-F</sub> = 285.0 Hz), 120.70, 86.82, 85.54, 72.30 (q, *J*<sub>C-F</sub> = 31.0 Hz), 20.79, ppm; <sup>19</sup>F NMR (376 MHz, DMSO-*d*<sub>6</sub>):  $\delta$  -0.86, ppm.

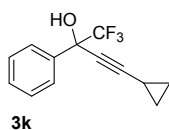

**4-cyclopropyl-1,1,1-trifluoro-2-phenylbut-3-yn-2-ol** [1]

Purification by flash chromatography (petroleum ether/EtOAc = 10:1): a pale yellow oil (80 mg, 67%);  $^1\text{H}$  NMR (400 MHz, DMSO- $d_6$ ):  $\delta$  7.65 (d,  $J$  = 8.0 Hz, 2H), 7.54 (s, 1H), 7.45-7.38 (m, 3H), 1.52-1.46 (m, 1H), 0.88 (dd,  $J$  = 8.2 Hz,  $J$  = 2.8 Hz, 2H), 0.72-0.69 (m, 2H), ppm;  $^{13}\text{C}$  NMR (100 MHz, DMSO- $d_6$ ):  $\delta$  138.19, 130.05, 129.03, 128.10, 123.43 (t,  $J_{\text{C-F}}$  = 284.0 Hz), 92.09, 72.82, 72.58 (q,  $J_{\text{C-F}}$  = 31.0 Hz), 9.19, 9.14, 0.00, ppm;  $^{19}\text{F}$  NMR (376 MHz, DMSO- $d_6$ ):  $\delta$  -1.08, ppm.

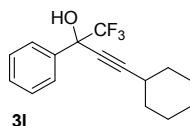

**4-cyclohexyl-1,1,1-trifluoro-2-phenylbut-3-yn-2-ol**

Purification by flash chromatography (petroleum ether/EtOAc = 10:1): a pale yellow oil (86 mg, 61%);  $^1\text{H}$  NMR (400 MHz, DMSO- $d_6$ ):  $\delta$  7.69 (d,  $J$  = 6.8 Hz, 2H), 7.54 (s, 1H), 7.46-7.39 (m, 3H), 2.64-2.60 (m, 1H), 1.76 (d,  $J$  = 8.4 Hz, 2H), 1.70-1.66 (m, 2H), 1.53-1.43 (m, 3H), 1.38-1.35 (m, 3H), ppm;  $^{13}\text{C}$  NMR (100 MHz, DMSO- $d_6$ ):  $\delta$  137.65, 129.42, 128.38, 127.50, 122.86 (t,  $J_{\text{C-F}}$  = 284.0 Hz), 92.01, 77.59, 71.97 (q,  $J_{\text{C-F}}$  = 31.0 Hz), 32.02 (d,  $J_{\text{C-F}}$  = 3.7 Hz), 28.32, 25.73, 24.29, ppm;  $^{19}\text{F}$  NMR (376 MHz, DMSO- $d_6$ ):  $\delta$  -1.25, ppm; HRMS (EI):  $m/z$  calcd for  $\text{C}_{16}\text{H}_{17}\text{F}_3\text{O}$  [ $\text{M}$ ] $^+$  282.1232, found 282.1234.

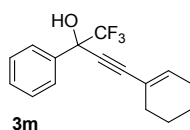

**4-(cyclohex-1-en-1-yl)-1,1,1-trifluoro-2-phenylbut-3-yn-2-ol**

Purification by flash chromatography (petroleum ether/EtOAc = 10:1): a pale yellow oil (116 mg, 83%);  $^1\text{H}$  NMR (400 MHz, DMSO- $d_6$ ):  $\delta$  7.70 (s, 2H), 7.68 (s, 1H), 7.47-7.40 (m, 3H), 6.26-6.24 (m, 1H), 2.12-2.10 (m, 4H), 1.62-1.54 (m, 4H), ppm;  $^{13}\text{C}$  NMR (100 MHz, DMSO- $d_6$ ):  $\delta$  137.71, 137.37, 129.53, 128.48, 127.47, 122.79 (t,  $J_{\text{C-F}}$  = 284.0 Hz), 119.24, 88.73, 83.53, 72.35 (q,  $J_{\text{C-F}}$  = 31.0 Hz), 28.76, 25.55, 22.06, 21.26, ppm;  $^{19}\text{F}$  NMR (376 MHz, DMSO- $d_6$ ):  $\delta$  -1.01, ppm; HRMS (MALDI):  $m/z$  calcd for  $\text{C}_{16}\text{H}_{15}\text{F}_3\text{O}$  [ $\text{M}+\text{H}-\text{H}_2\text{O}$ ] $^+$  263.1042, found 263.1044.

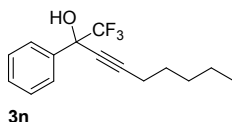

**1,1,1-trifluoro-2-phenylnon-3-yn-2-ol**

Purification by flash chromatography (petroleum ether/EtOAc = 10:1): a pale yellow oil (96 mg, 71%);  $^1\text{H}$  NMR (400 MHz, DMSO- $d_6$ ):  $\delta$  7.69 (d,  $J$  = 7.6 Hz, 2H), 7.56 (s, 1H), 7.45-7.41 (m, 3H), 2.35 (t,  $J$  = 7.2 Hz, 2H), 1.56-1.49 (m, 2H), 1.43-1.29 (m, 4H), 0.88 (t,  $J$  = 7.2 Hz, 3H), ppm;  $^{13}\text{C}$  NMR (100 MHz, DMSO- $d_6$ ):  $\delta$  137.62, 129.43, 128.35, 127.49, 122.85 (t,  $J_{\text{C-F}}$  = 284.0 Hz), 88.54, 77.41, 71.98 (q,  $J_{\text{C-F}}$  = 31.0 Hz), 30.75, 27.78, 21.97, 18.22, 14.25, ppm;  $^{19}\text{F}$  NMR (376 MHz, DMSO- $d_6$ ):  $\delta$  -1.20, ppm; HRMS (EI):  $m/z$  calcd for  $\text{C}_{15}\text{H}_{17}\text{F}_3\text{O}$  [ $\text{M}$ ] $^+$  270.1232, found 270.1231.

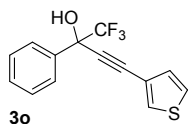

**1,1,1-trifluoro-2-phenyl-4-(thiophen-3-yl)but-3-yn-2-ol**

Purification by flash chromatography (petroleum ether/EtOAc = 10:1): a pale yellow oil (120 mg, 85%);  $^1\text{H}$  NMR (400 MHz, DMSO- $d_6$ ):  $\delta$  8.00 (s, 1H), 7.94 (s, 1H), 7.79 (d,  $J$  = 6.8 Hz, 2H), 7.67 (s, 1H), 7.49-7.47 (m, 3H), 7.28 (d,  $J$  = 4.8 Hz, 1H), ppm;  $^{13}\text{C}$  NMR (100 MHz, DMSO- $d_6$ ):  $\delta$  137.13, 132.05, 130.01, 129.67, 128.60, 127.70, 127.54, 122.79 (t,  $J_{\text{C-F}}$  = 284.0 Hz), 85.53, 82.58, 72.59 (q,  $J_{\text{C-F}}$  = 31.0 Hz), ppm;  $^{19}\text{F}$  NMR (376 MHz, DMSO- $d_6$ ):  $\delta$  -0.79, ppm;  $^{19}\text{F}$  NMR (376 MHz, DMSO- $d_6$ ):  $\delta$  -0.77, ppm; HRMS (EI):  $m/z$  calcd for  $\text{C}_{14}\text{H}_9\text{F}_3\text{OS}$   $[\text{M}]^+$  282.0326, found 282.0327.

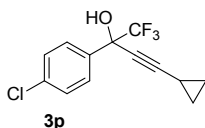

**2-(4-chlorophenyl)-4-cyclopropyl-1,1,1-trifluorobut-3-yn-2-ol**

Purification by flash chromatography (petroleum ether/EtOAc = 10:1): a pale yellow oil (111 mg, 81%);  $^1\text{H}$  NMR (400 MHz, DMSO- $d_6$ ):  $\delta$  7.71 (s, 1H), 7.66 (d,  $J$  = 8.4 Hz, 2H), 7.50 (d,  $J$  = 8.4 Hz, 2H), 1.53-1.47 (s, 1H), 0.93-0.87 (m, 2H), 0.76-0.69 (m, 2H), ppm;  $^{13}\text{C}$  NMR (100 MHz, DMSO- $d_6$ ):  $\delta$  137.26, 135.05, 130.05, 129.18, 123.25 (t,  $J_{\text{C-F}}$  = 284.0 Hz), 92.58, 72.33, 72.25, (q,  $J_{\text{C-F}}$  = 31.0 Hz), 9.25, 9.20, 0.00, ppm;  $^{19}\text{F}$  NMR (376 MHz, DMSO- $d_6$ ):  $\delta$  -1.27, ppm; HRMS (MALDI):  $m/z$  calcd for  $\text{C}_{13}\text{H}_{10}\text{ClF}_3\text{O}$   $[\text{M}+\text{H}-\text{H}_2\text{O}]^+$  257.0339, found 257.0340.

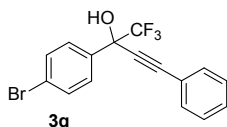

**2-(4-bromophenyl)-1,1,1-trifluoro-4-phenylbut-3-yn-2-ol** [3]

Purification by flash chromatography (petroleum ether/EtOAc = 10:1): a pale yellow oil (165 mg, 93%);  $^1\text{H}$  NMR (400 MHz, DMSO- $d_6$ ):  $\delta$  8.14 (s, 1H), 7.73 (q,  $J$  = 8.8 Hz, 4H), 7.61-7.59 (m, 2H), 7.52-7.44 (m, 3H), ppm;  $^{13}\text{C}$  NMR (100 MHz, DMSO- $d_6$ ):  $\delta$  136.56, 132.15, 131.68, 130.19, 129.74, 129.28, 123.36, 122.53 (t,  $J_{\text{C-F}}$  = 284.0 Hz), 120.85, 87.25, 85.46, 72.22 (q,  $J_{\text{C-F}}$  = 31.0 Hz), ppm;  $^{19}\text{F}$  NMR (376 MHz, DMSO- $d_6$ ):  $\delta$  -0.98, ppm.

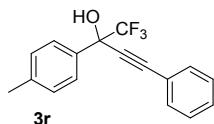

**1,1,1-trifluoro-4-phenyl-2-(p-tolyl)but-3-yn-2-ol** [1]

Purification by flash chromatography (petroleum ether/EtOAc = 10:1): a pale yellow oil (96 mg, 66%);  $^1\text{H}$  NMR (400 MHz, DMSO- $d_6$ ):  $\delta$  7.88 (s, 1H), 7.66 (d,  $J$  = 8.0 Hz, 2H), 7.57 (dd,  $J$  = 7.2 Hz,  $J$  = 2.0 Hz, 2H), 7.50-7.43 (m, 3H), 7.28 (d,  $J$  = 8.0 Hz, 2H),

2.34 (s, 3H), ppm;  $^{13}\text{C}$  NMR (100 MHz,  $\text{DMSO-}d_6$ ):  $\delta$  139.17, 134.18, 132.09, 130.05, 129.29, 129.16, 127.42, 122.83 (t,  $J_{\text{C-F}} = 284.0$  Hz), 121.11, 86.74, 86.24, 72.41 (q,  $J_{\text{C-F}} = 31.0$  Hz), 21.08, ppm;  $^{19}\text{F}$  NMR (376 MHz,  $\text{DMSO-}d_6$ ):  $\delta$  -0.93, ppm.

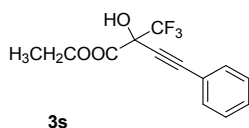

**ethyl 2-hydroxy-2-(4-phenyl-2-(trifluoromethyl)but-3-ynoate** [4]

Purification by flash chromatography (petroleum ether/EtOAc = 10:1): a pale yellow oil (131 mg, 96%);  $^1\text{H}$  NMR (400 MHz,  $\text{DMSO-}d_6$ ):  $\delta$  8.30 (s, 1H), 7.54-7.44 (m, 5H), 4.34-4.31 (m, 2H), 1.29 (t,  $J = 7.2$  Hz, 3H), ppm;  $^{13}\text{C}$  NMR (100 MHz,  $\text{DMSO-}d_6$ ):  $\delta$  165.18, 132.16, 130.39, 129.30, 122.76 (q,  $J_{\text{C-F}} = 284.0$  Hz), 120.39, 86.71, 82.04, 72.12 (q,  $J_{\text{C-F}} = 32.0$  Hz), 63.47, 14.11, ppm;  $^{19}\text{F}$  NMR (376 MHz,  $\text{DMSO-}d_6$ ):  $\delta$  1.14, ppm.

## Reference

- [1] C. A. Correia, D. T. McQuade and P. H. Seeberger, *Adv. Synth. Catal.*, 2013, **355**, 3517–3521.
- [2] H. Wang, K.-F. Yang, L. Li, Y. Bai, Z.-J. Zheng, W.-Q. Zhang, Z.-W. Gao and L.-W. Xu, *ChemCatChem*, 2014, **6**, 580–591.
- [3] R. Motoki, M. Kanai and M. Shibasaki, *Org. Lett.*, 2007, **9**, 2997–3000.
- [4] G.-J. Deng and C.-J. Li, *Synlett*, 2008, 1571-1573.

## NMR Spectra for all Products

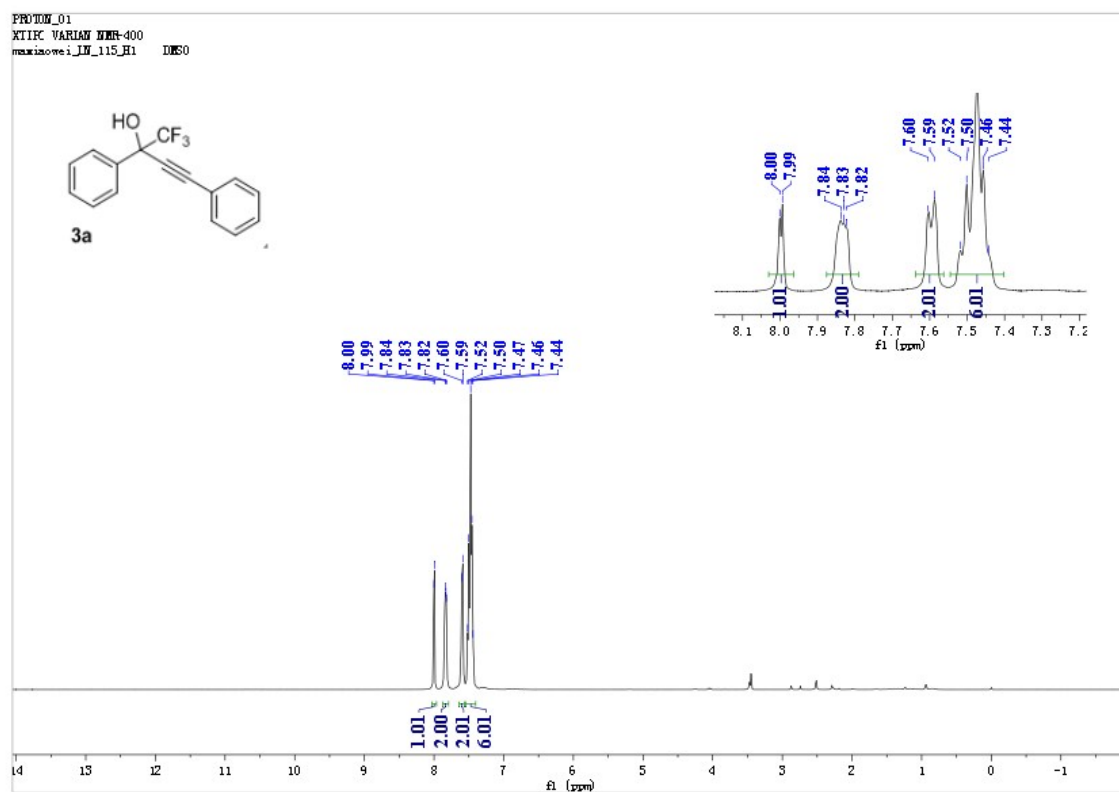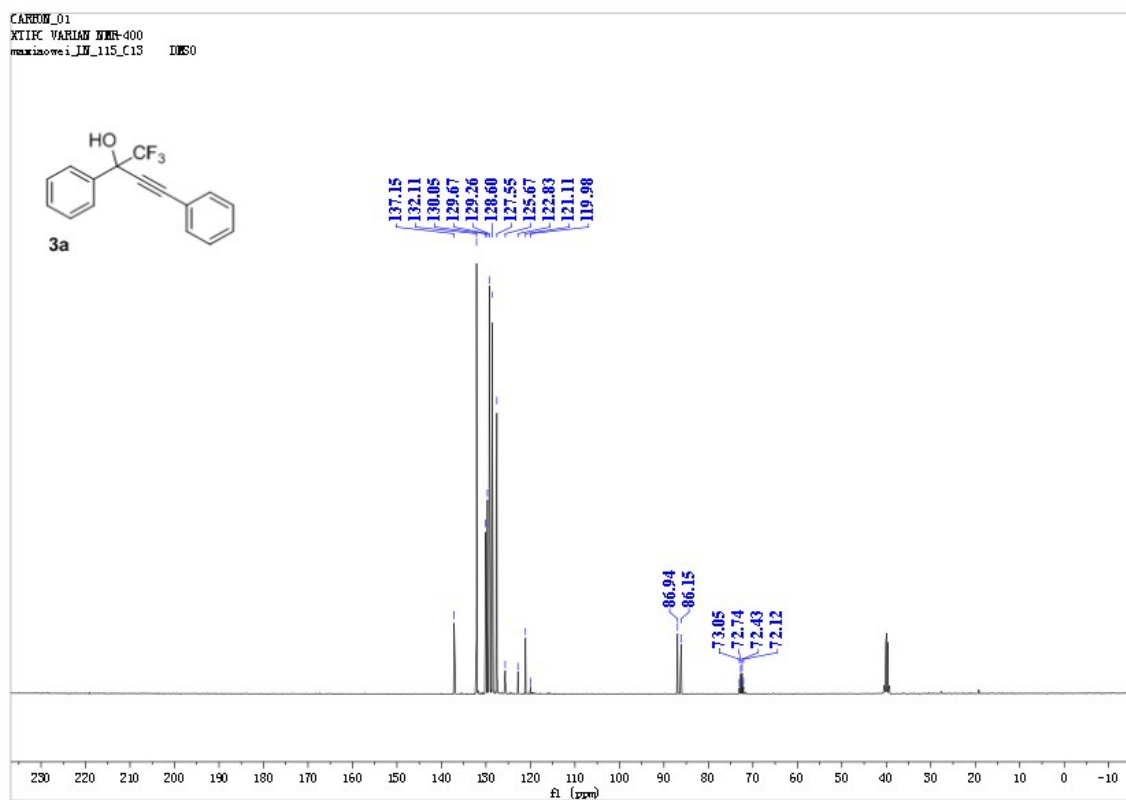

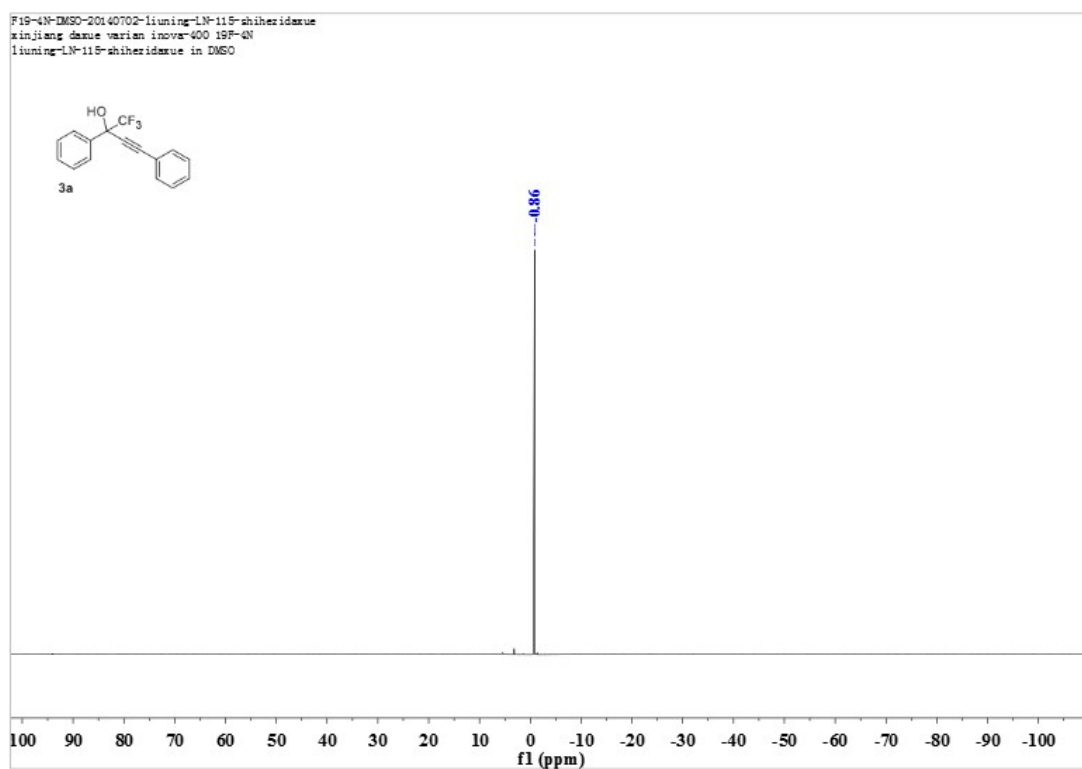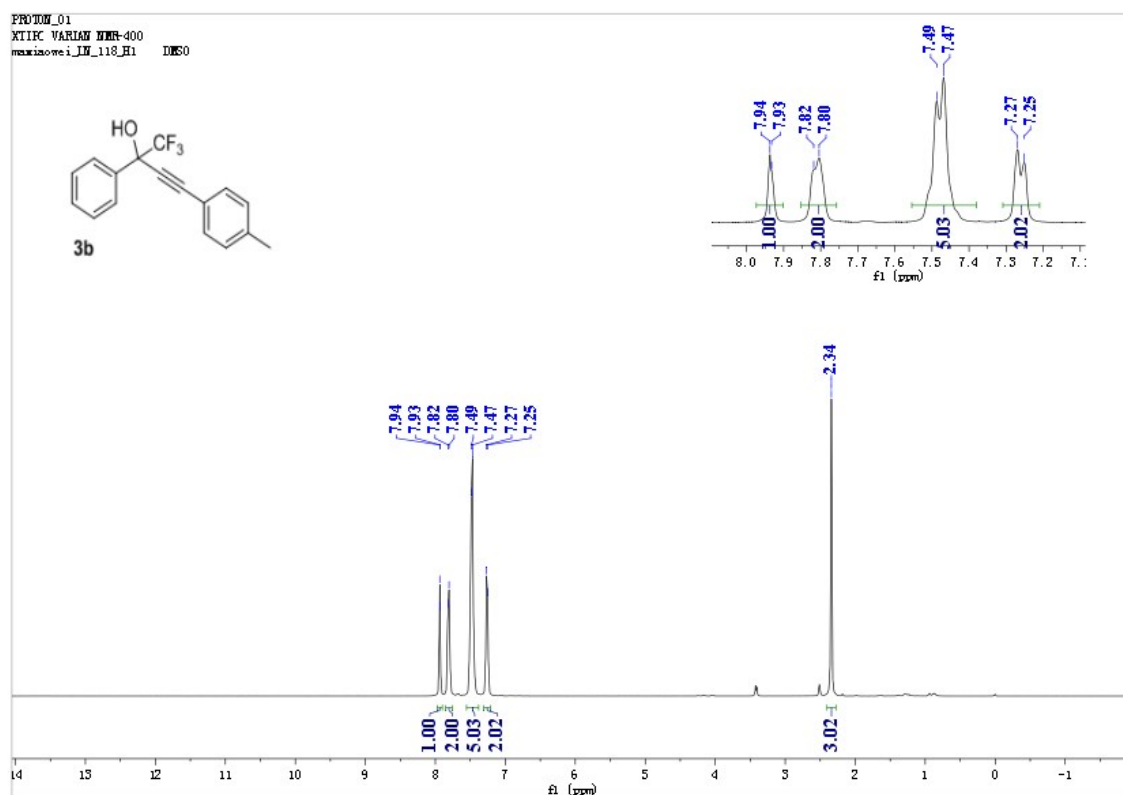

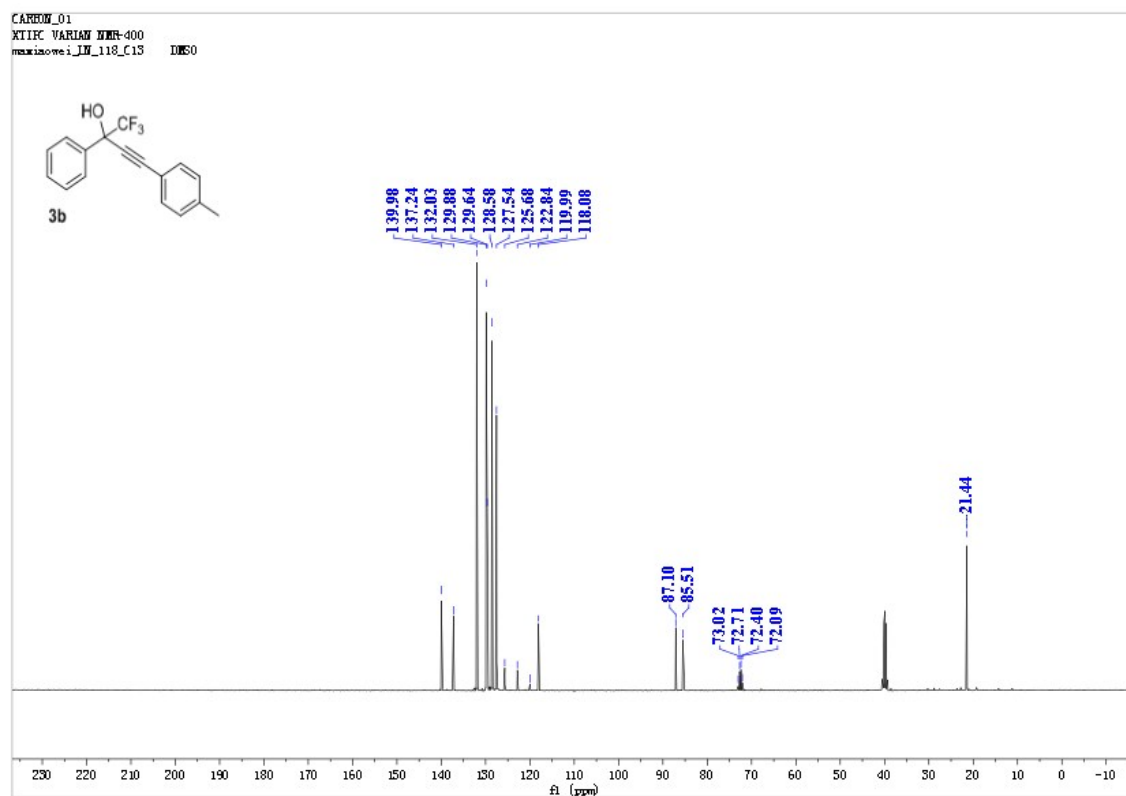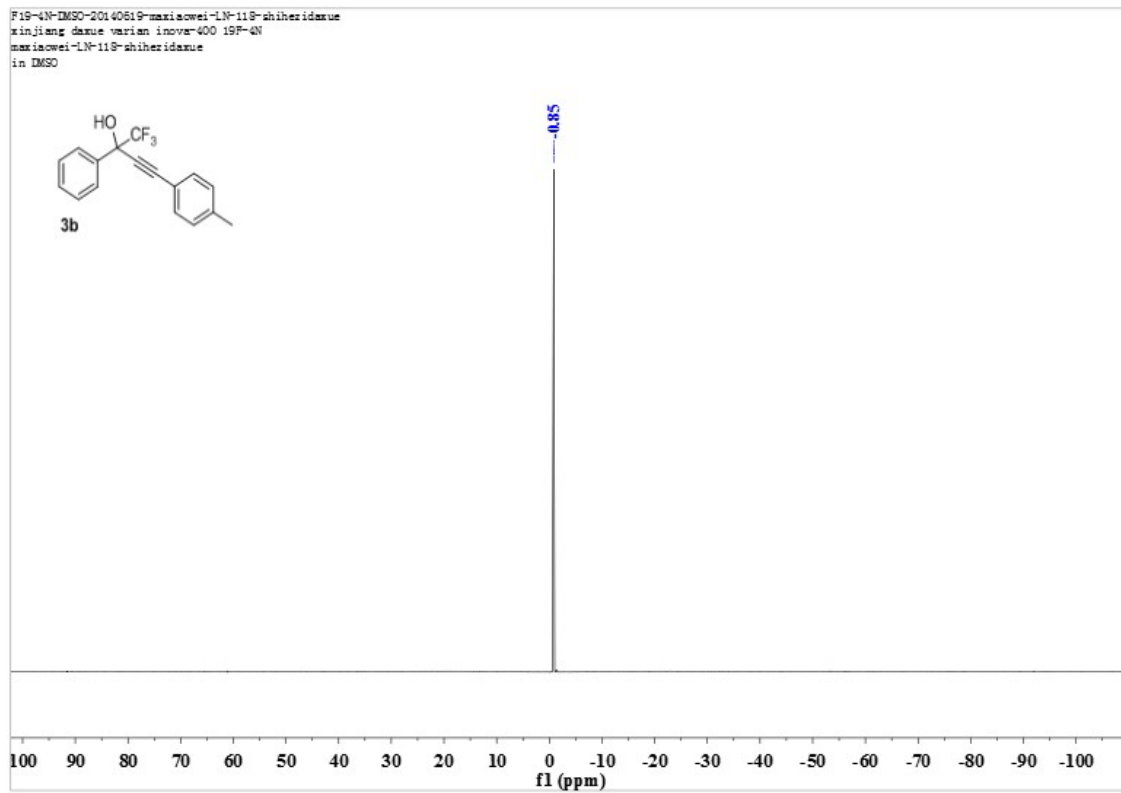

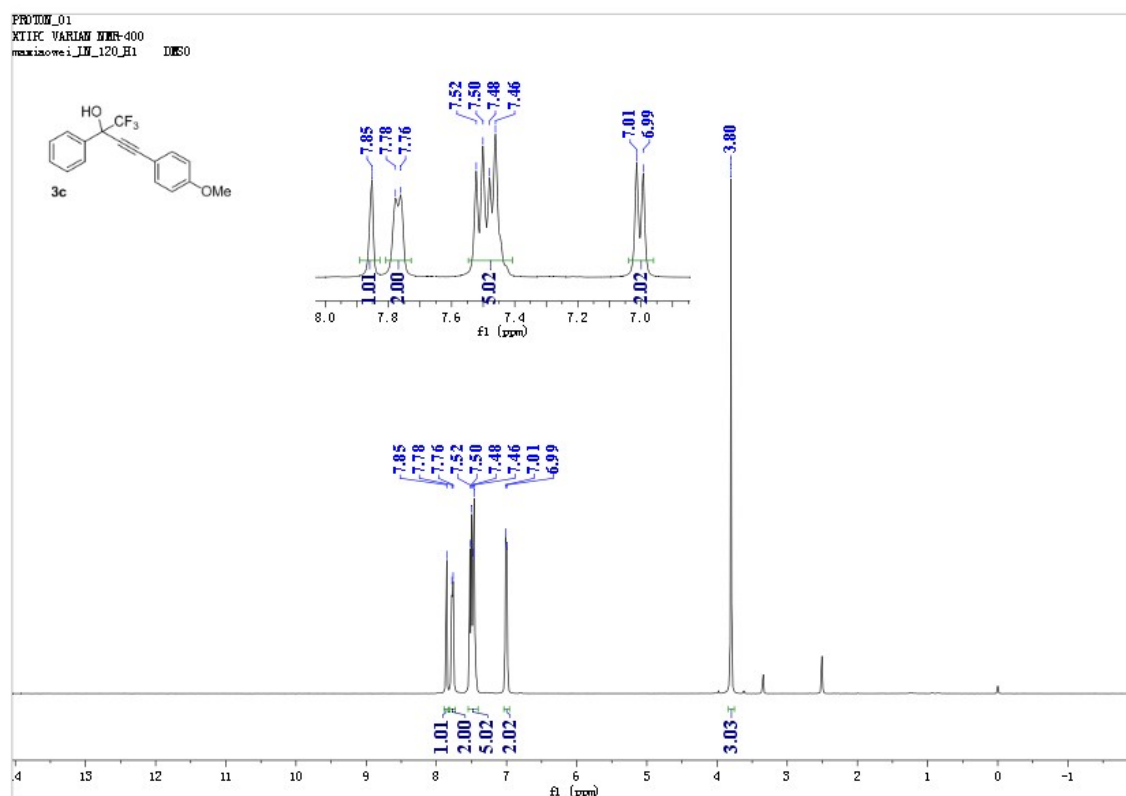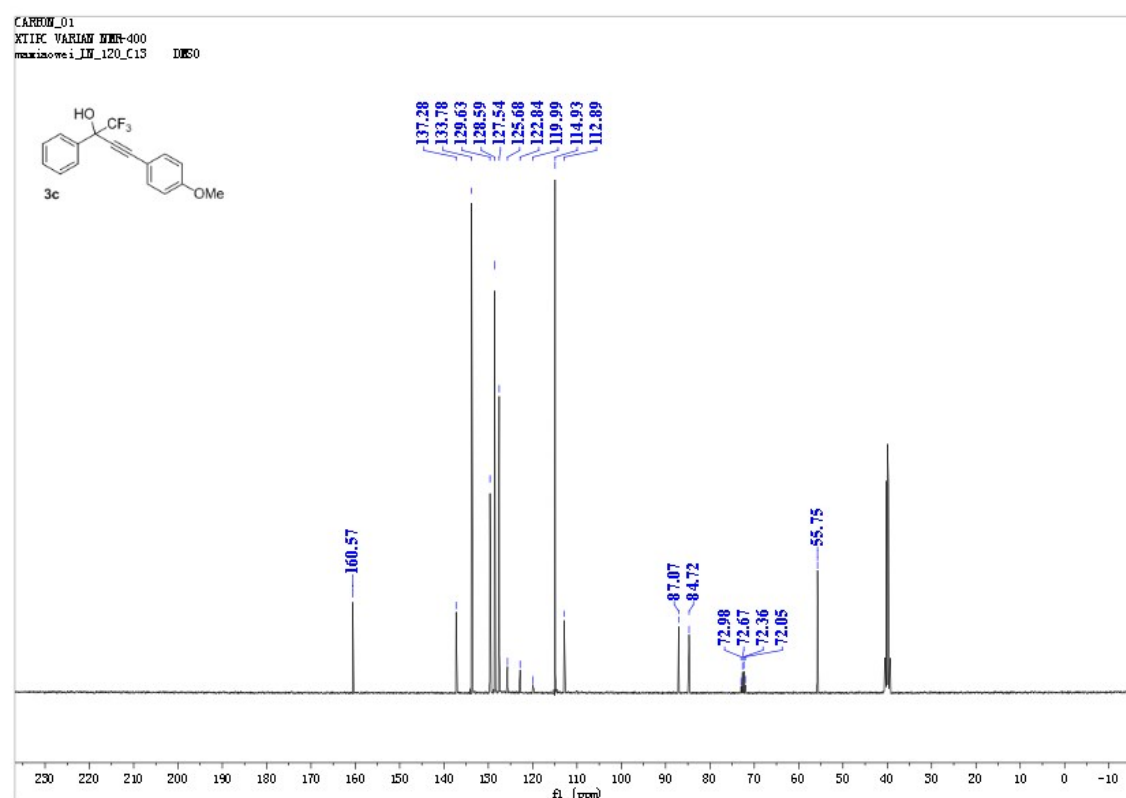

F19-4N-DMSO-20140619-maxiaowei-LN-120-shiheridanue  
xinjiang daxue varian inovo-400 19F-4N  
maxiaowei-LN-120-shiheridanue  
in DMSO

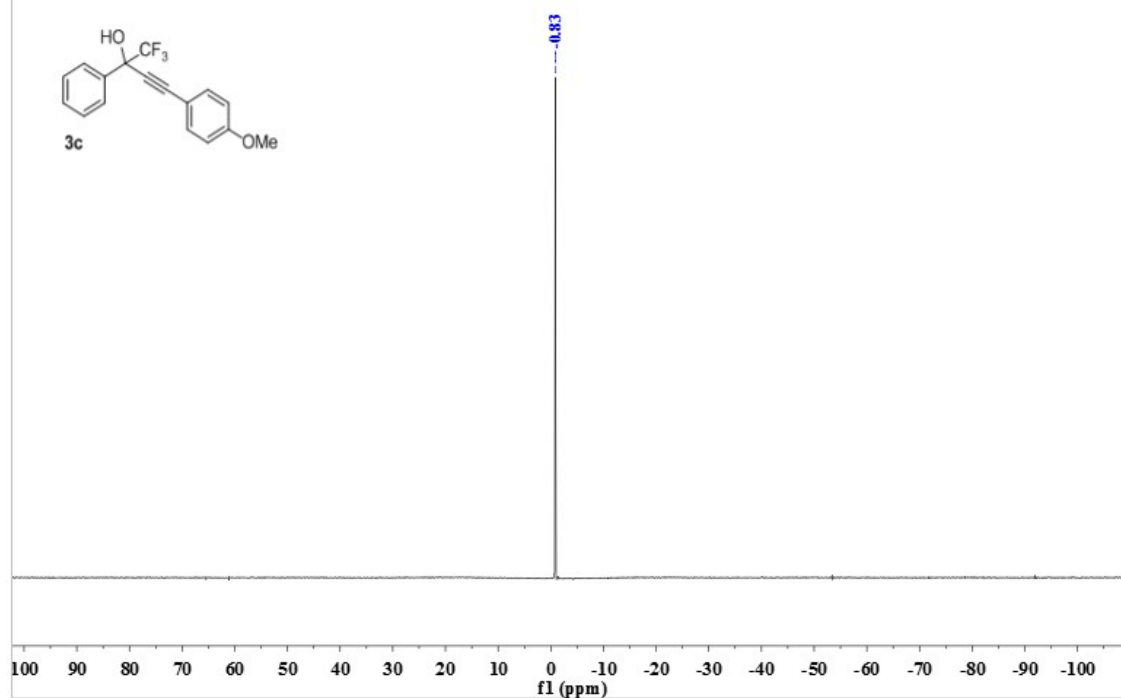

PROTON\_01  
XTHC VARIAN MR-400  
maxiaoweiLN\_137\_h1 dmsd\_36

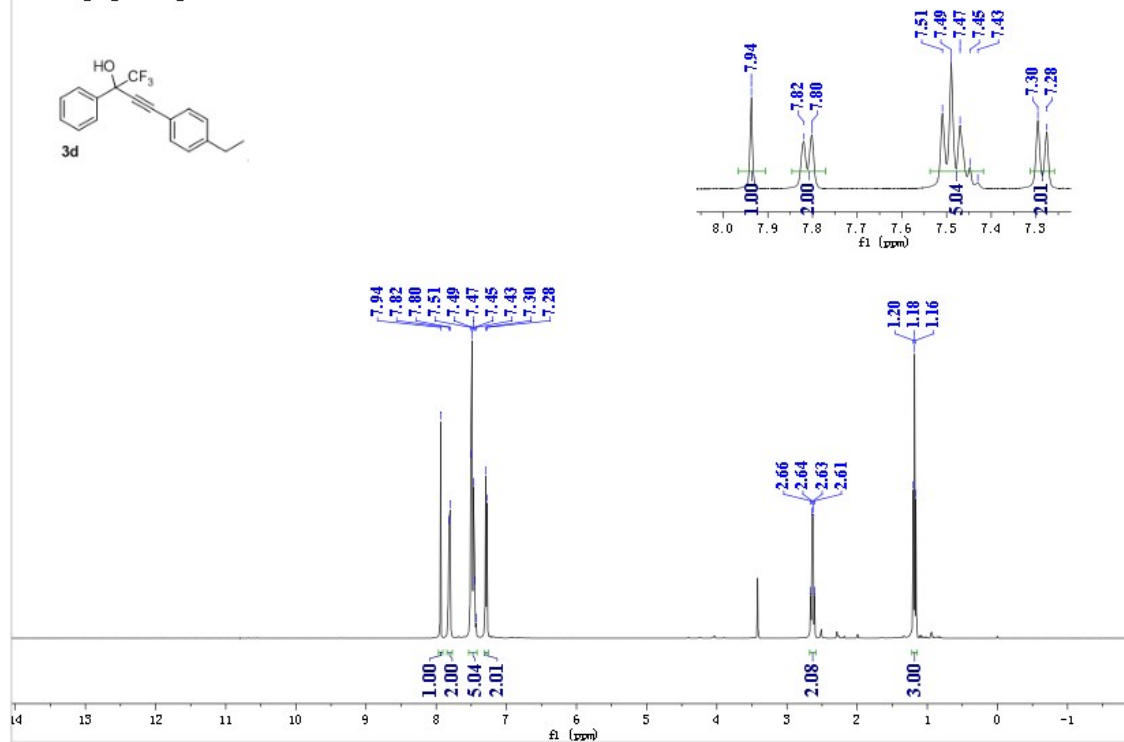

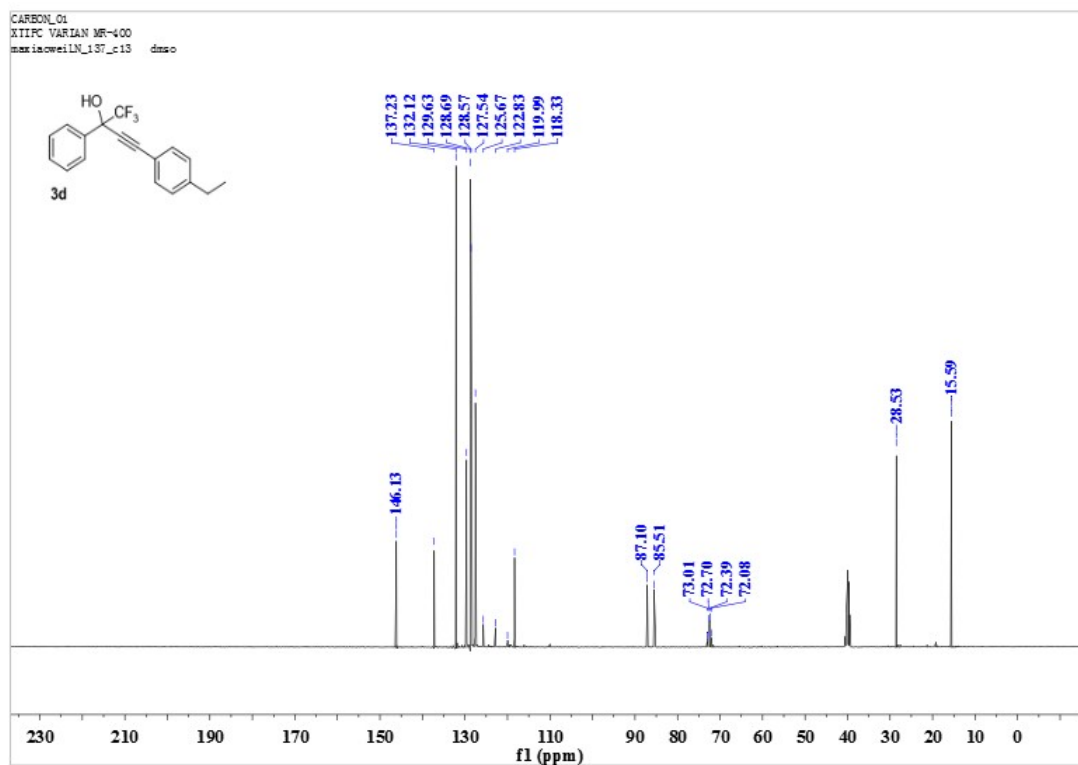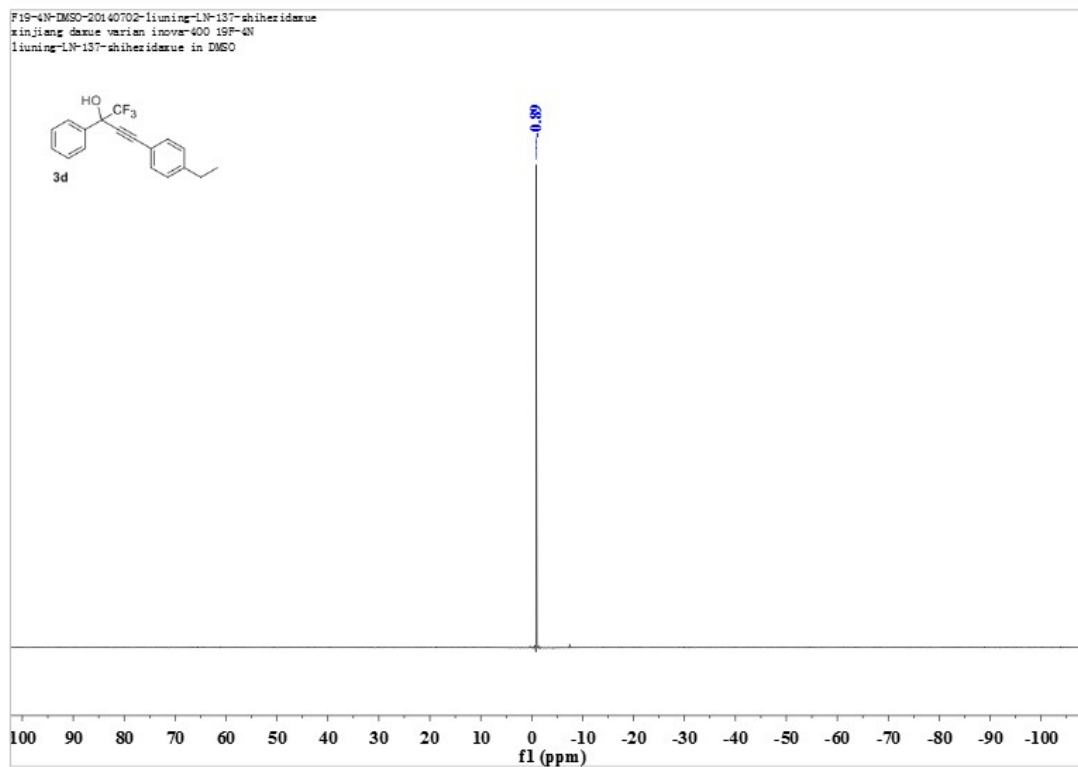

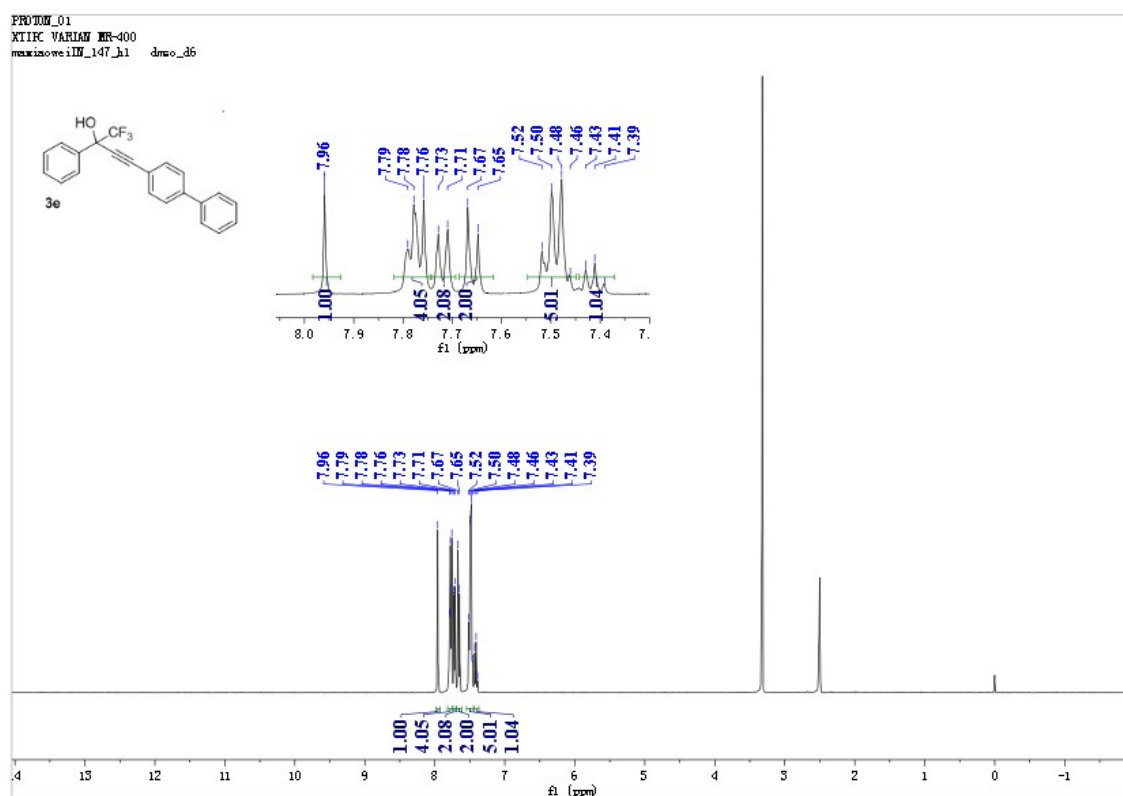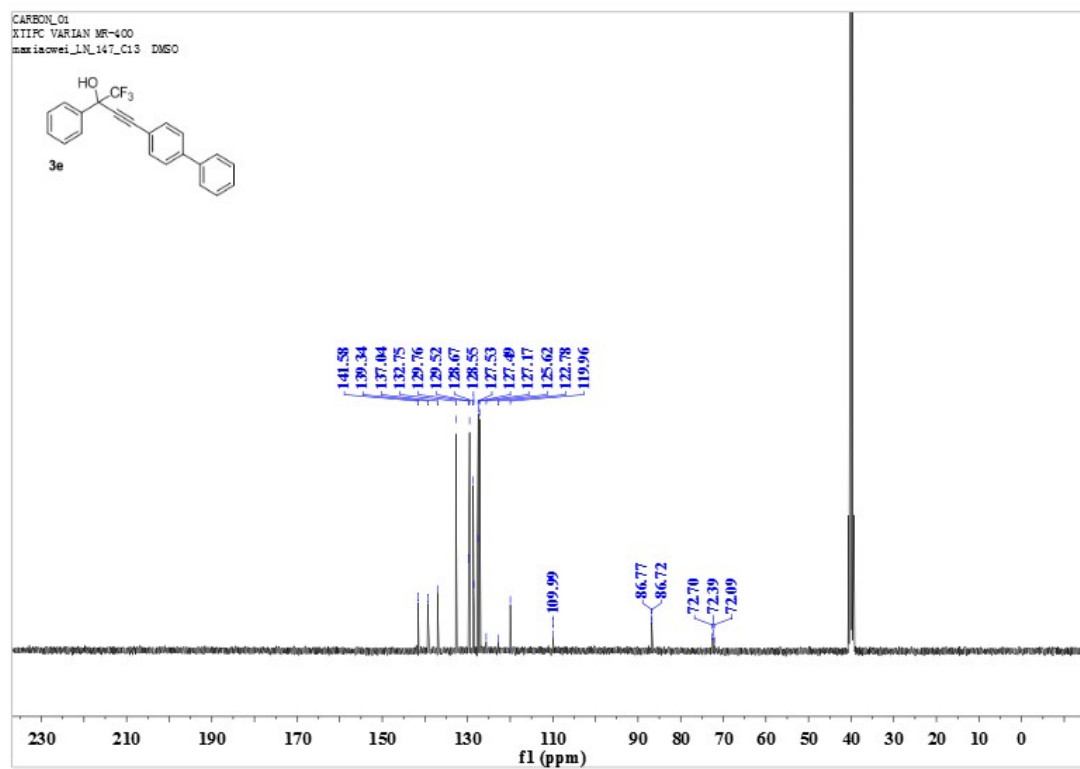

F19-4N-DMSO-20140702-liuning-LN-147-shiheridaxue  
xinjiang daxue varian inova-400 1H-4N  
liuning-LN-147-shiheridaxue in DMSO

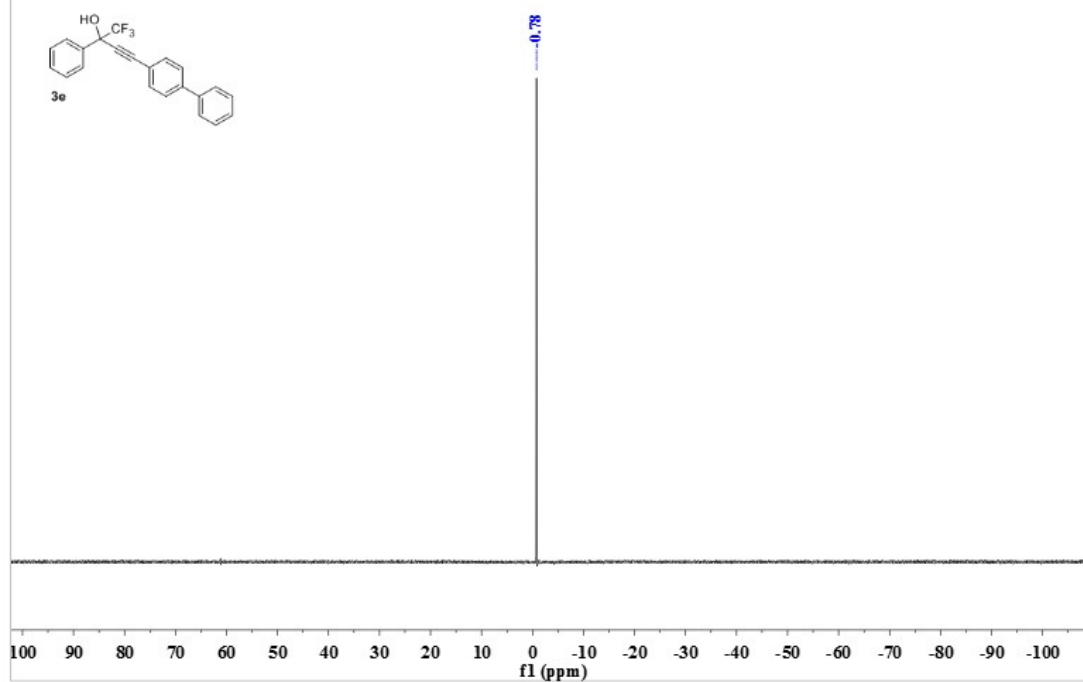

H1-4N-DMSO-20140627-liuning-LN-171-shiheridaxue  
xinjiang daxue varian inova-400 1H-4N  
liuning-LN-171-shiheridaxue in DMSO

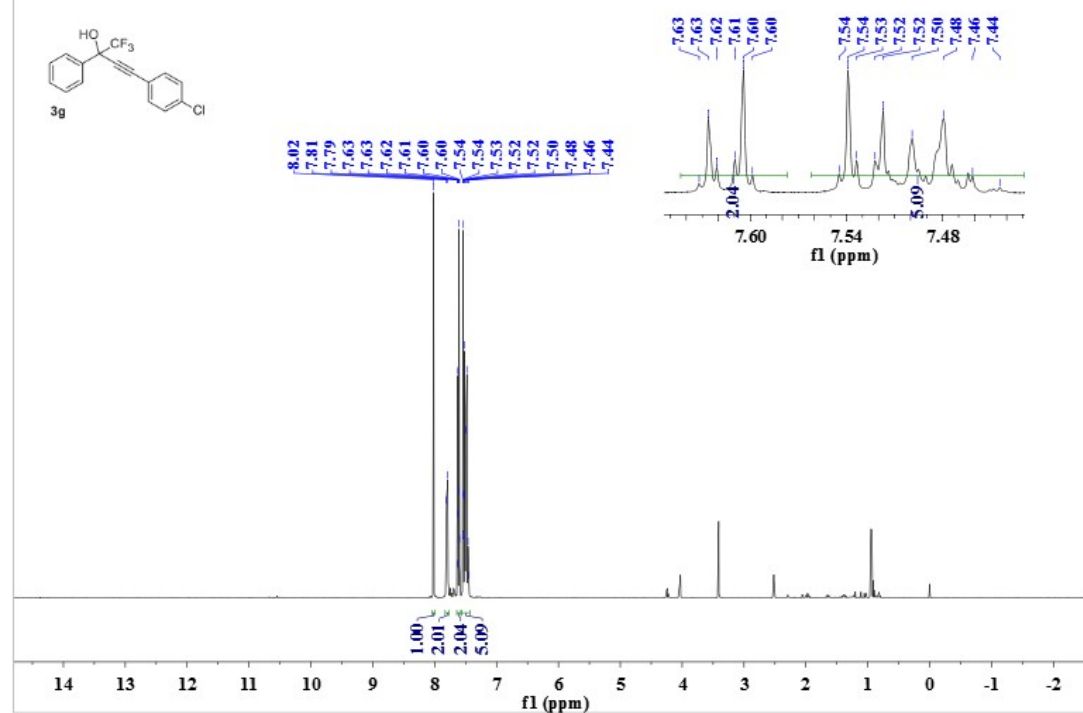

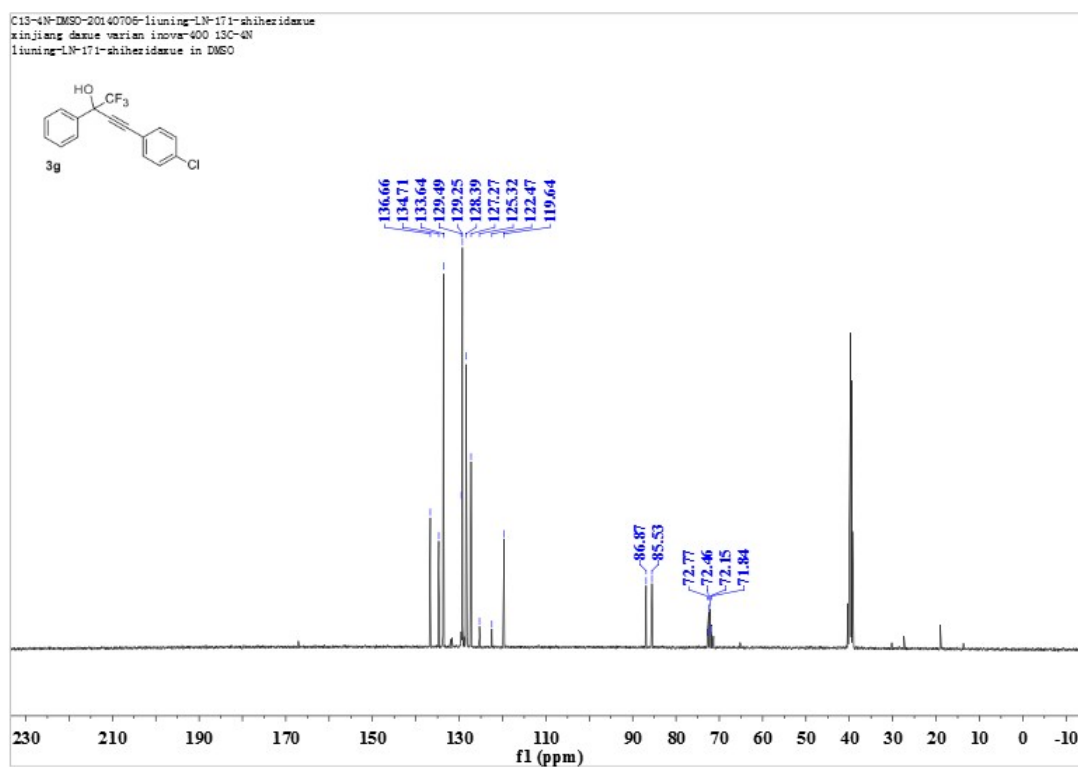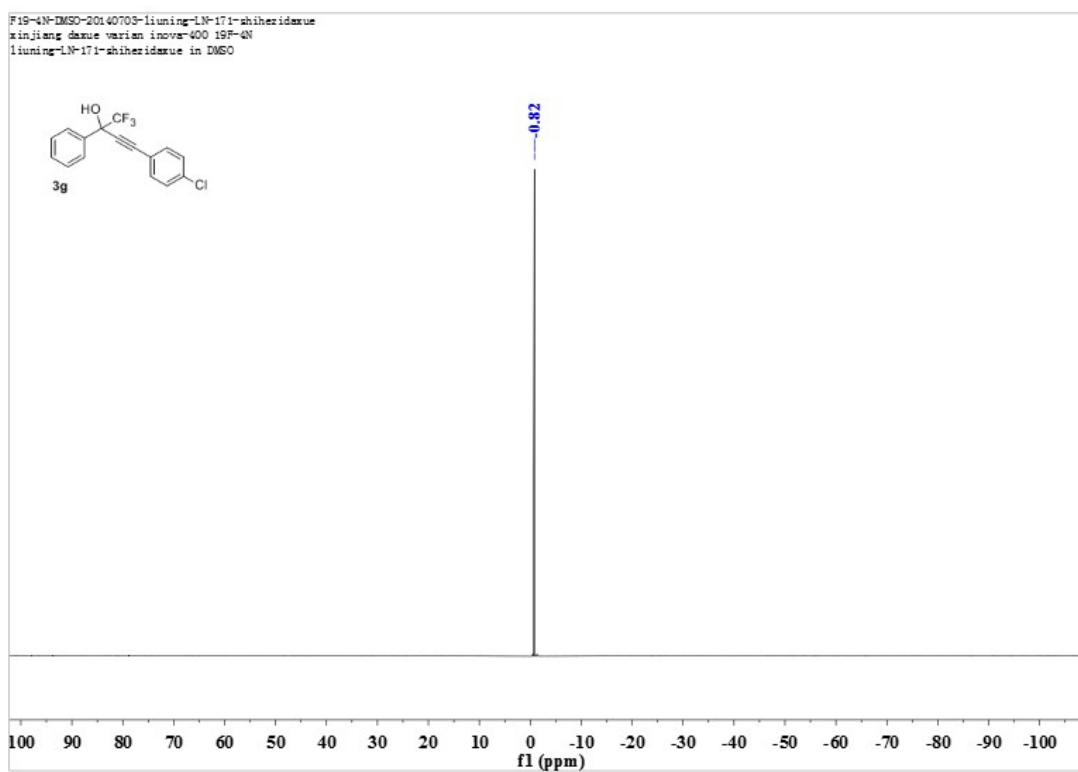

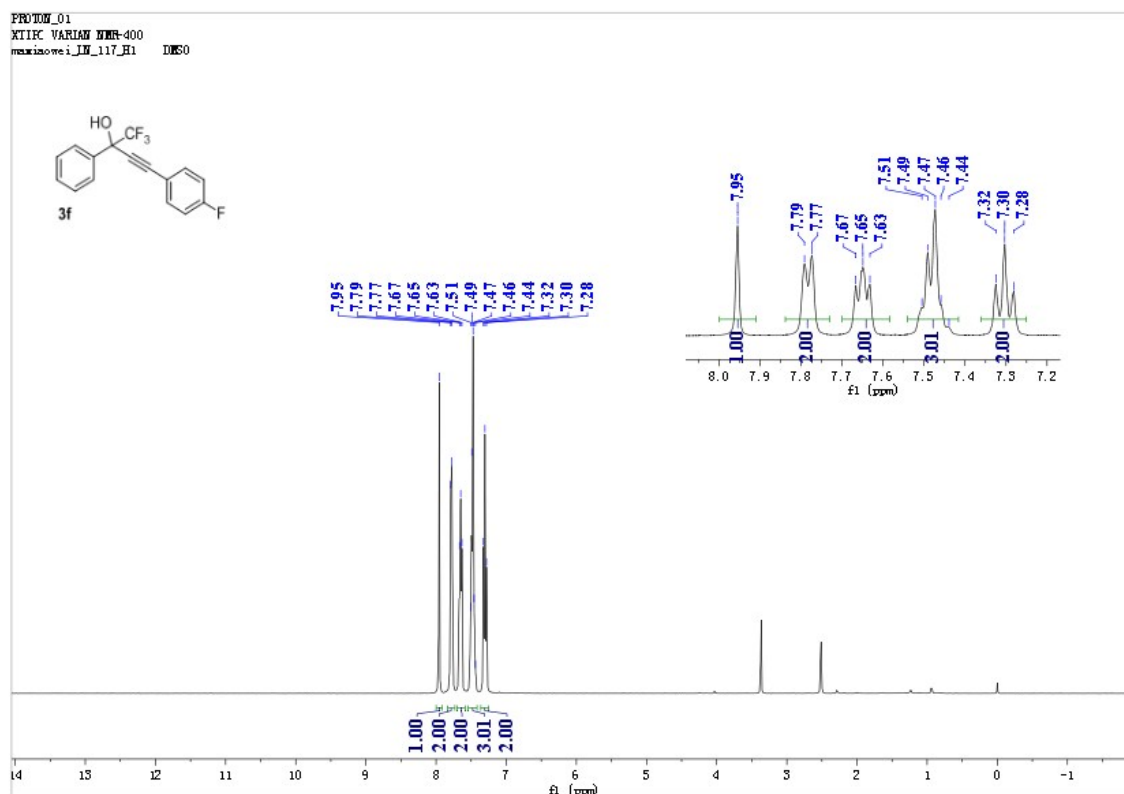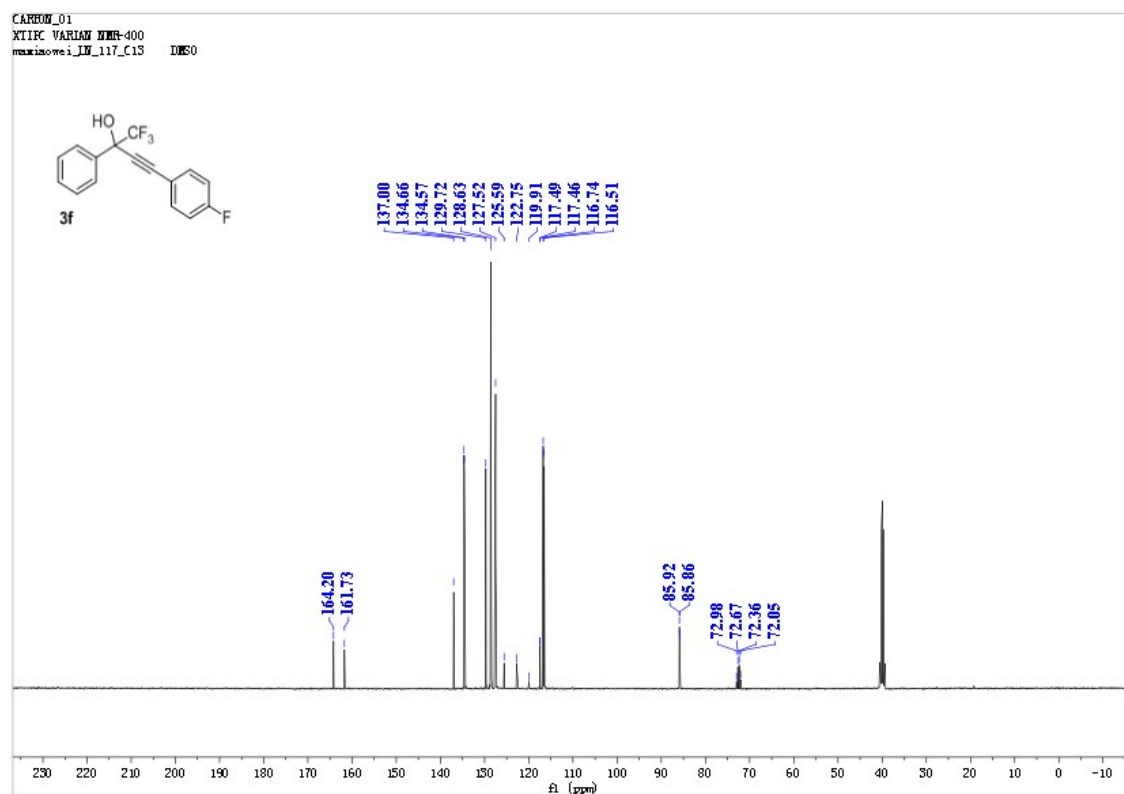

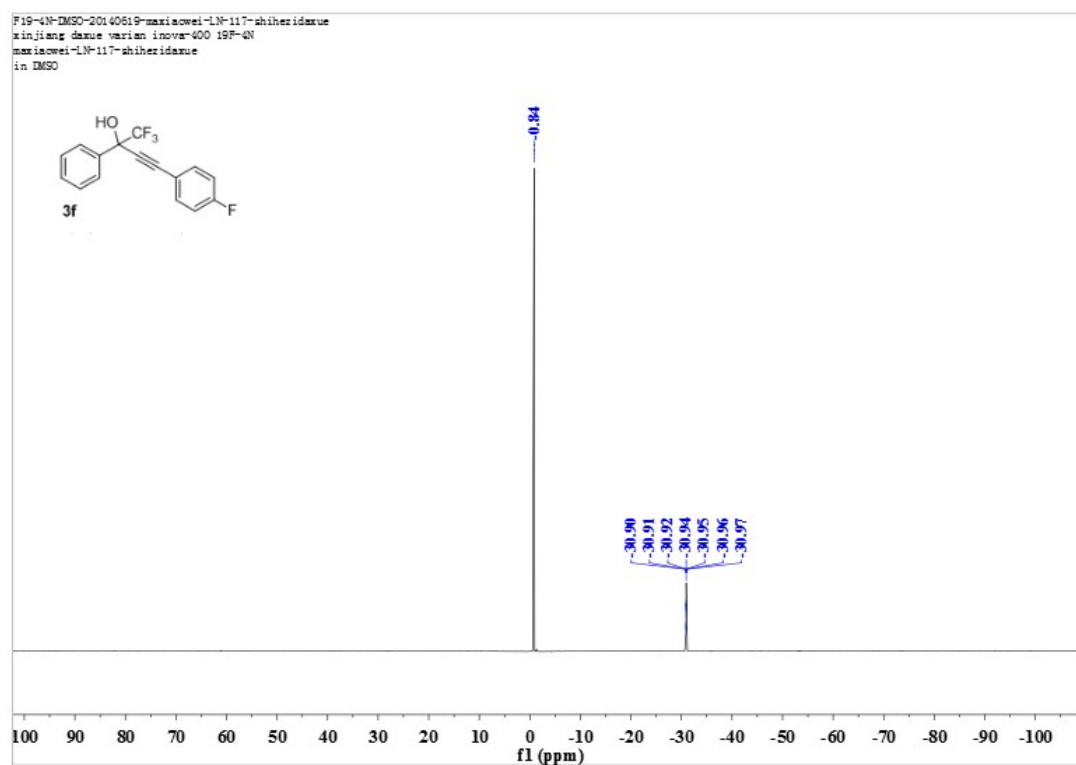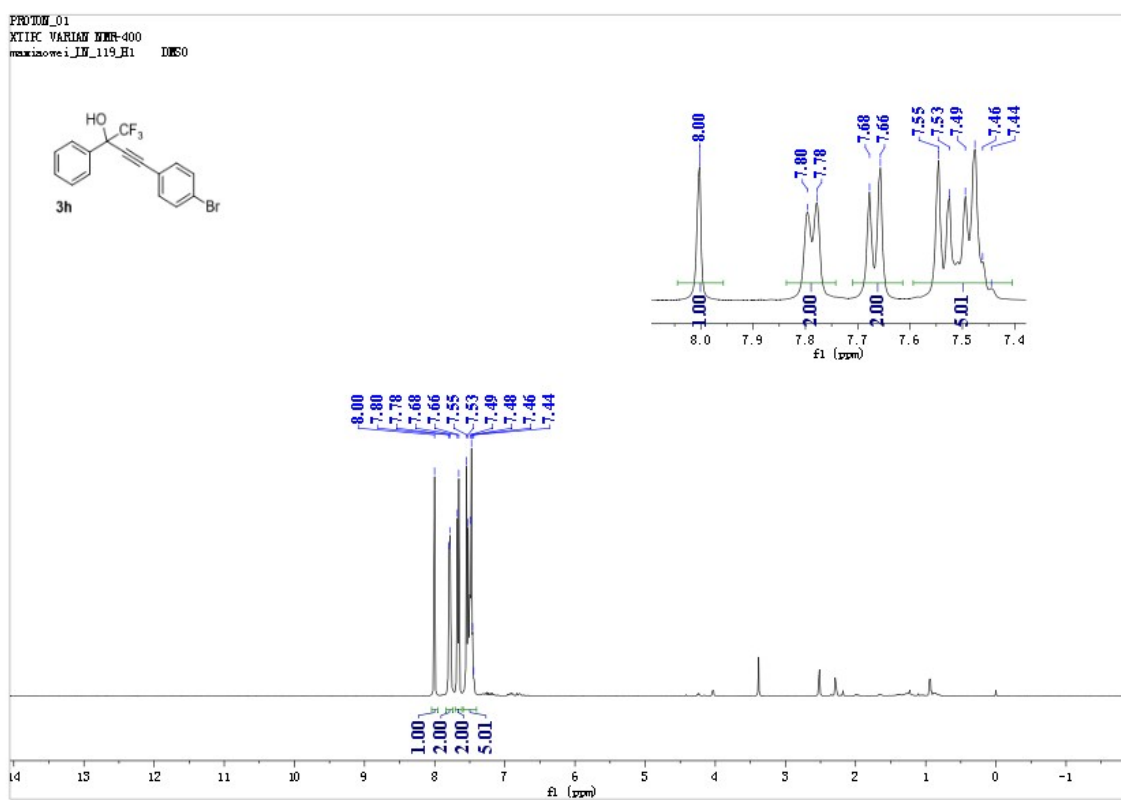

CARBON\_01  
 XTTC VARIAN INOVA-400  
 maxiaowei\_LN\_119\_C13 DMSO

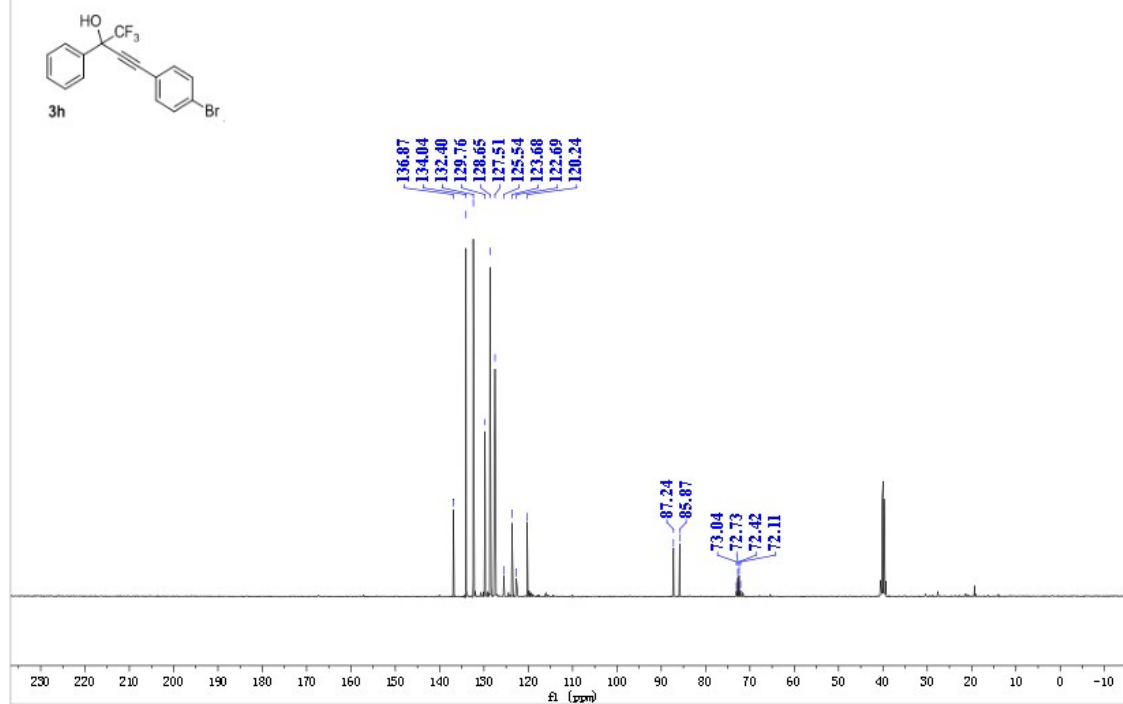

F19-4N-DMSO-20140619-maxiaowei-LN-119-shihexidanue  
 xinjiang daxue varian inova-400 19F-4N  
 maxiaowei-LN-119-shihexidanue  
 in DMSO

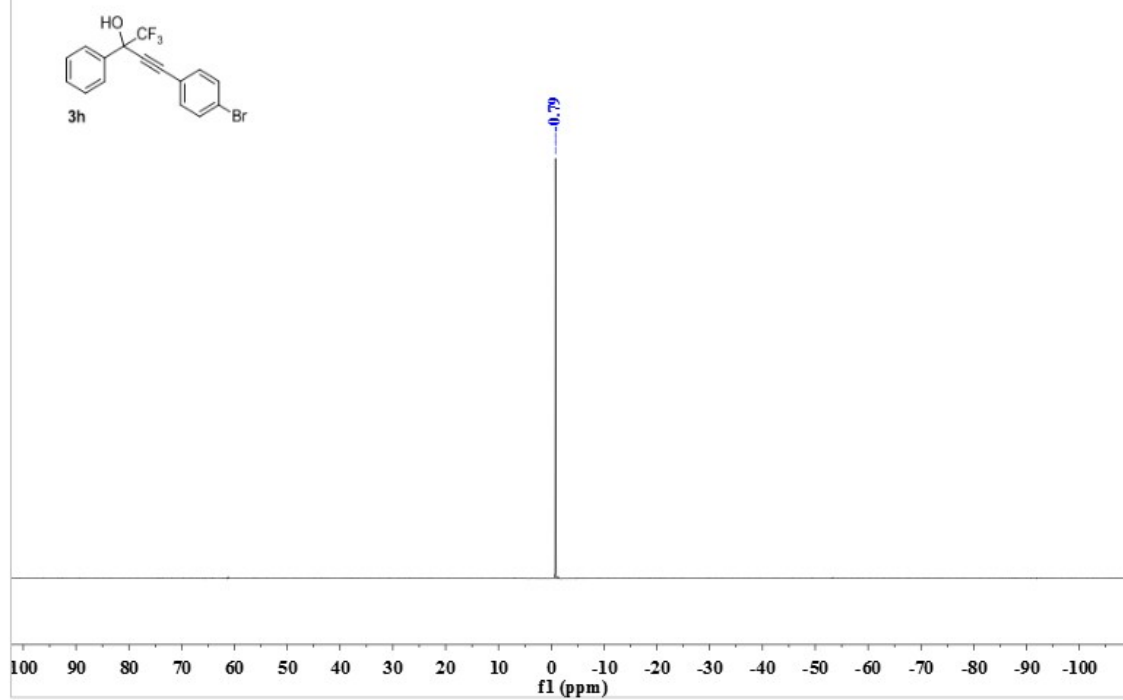

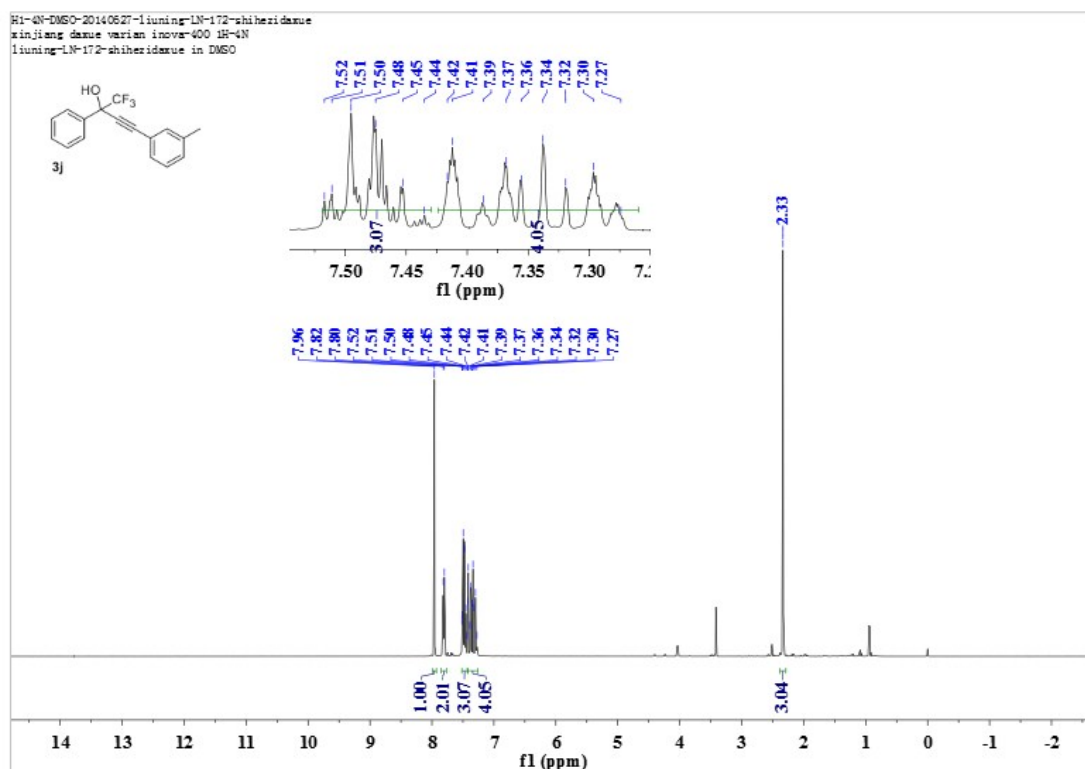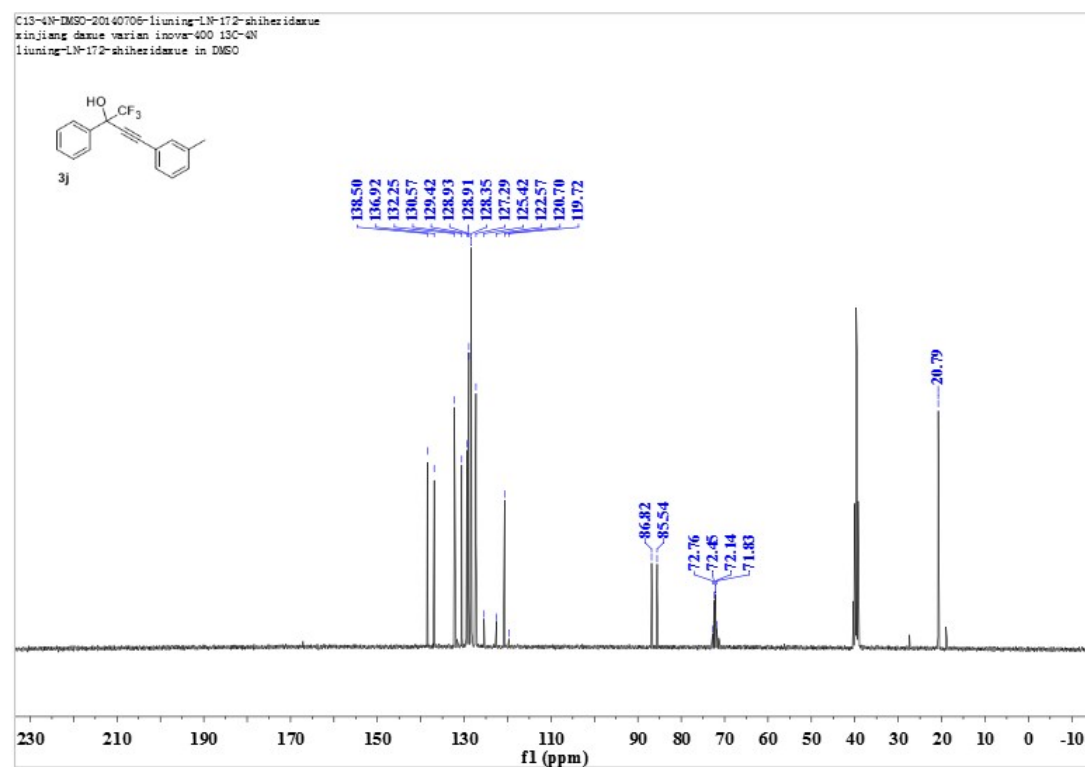

F18-IN-DMSO-20140703-liuning-IN-172-shiheridaxue  
xinjiang daxue varian innova-400 19F-4M  
liuning-IN-172-shiheridaxue in DMSO

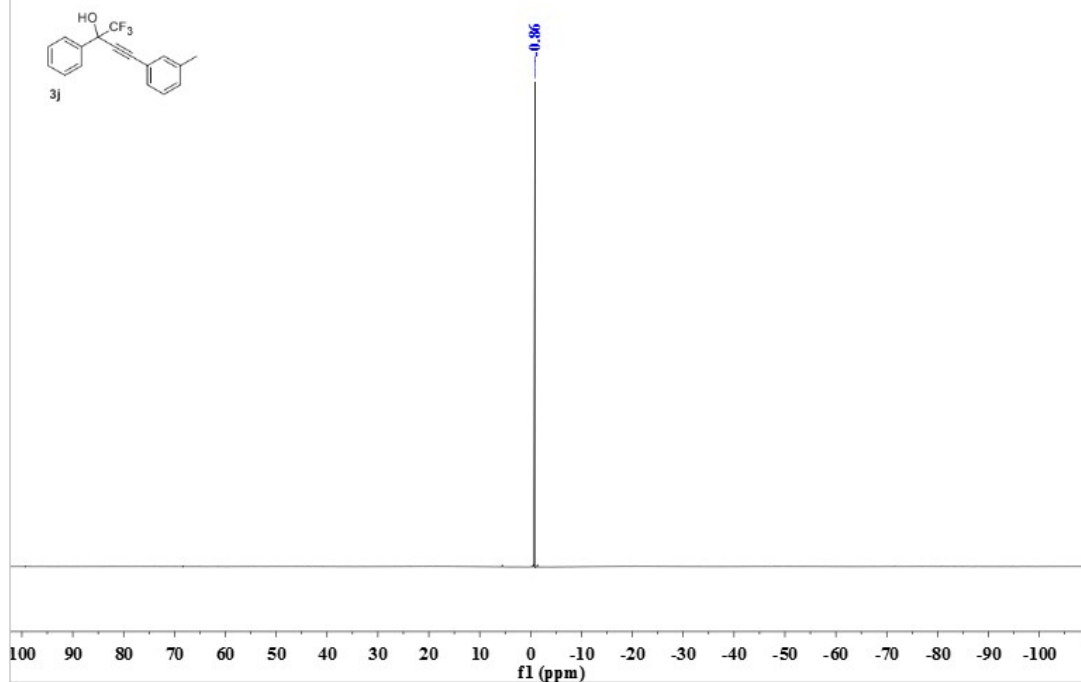

PROTON\_01  
XTEC VARIAN NMR-400  
maximowei-IN\_116\_H1 DMSO

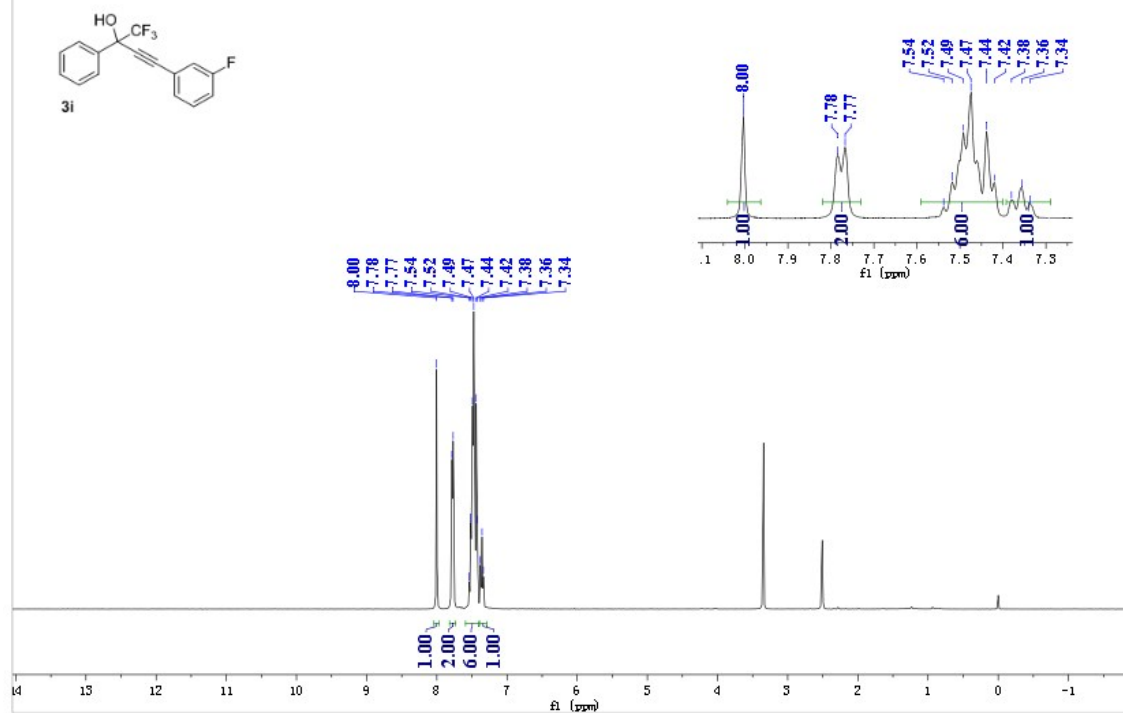

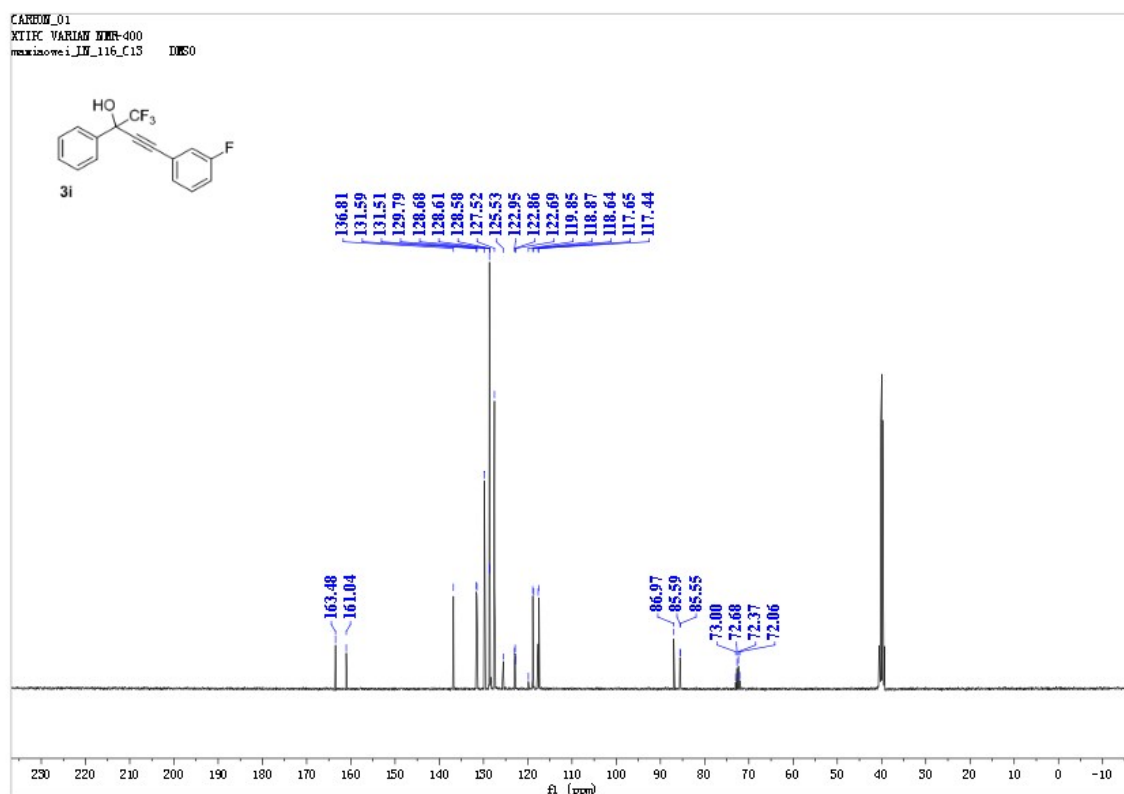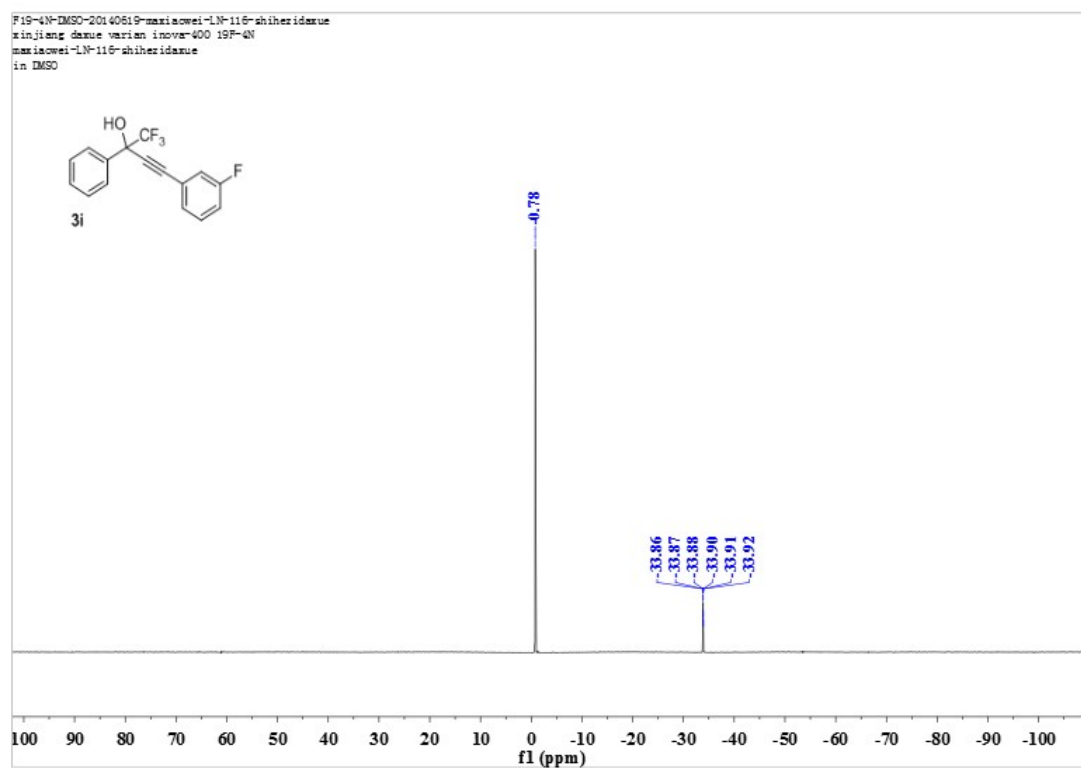

PROTON\_01  
 XTIFC VARIAN MR-400  
 maxinowei\_152\_h1 dms-d6

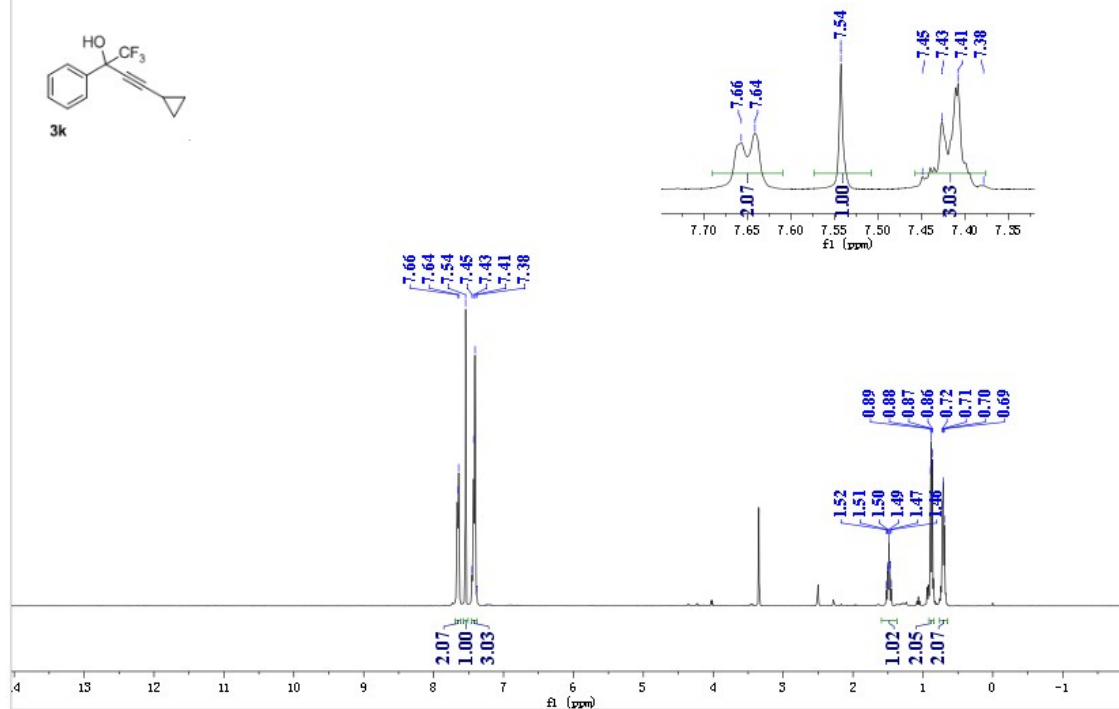

CARBON\_01  
 XTIFC VARIAN MR-400  
 maxinowei\_152\_G13 DMSO

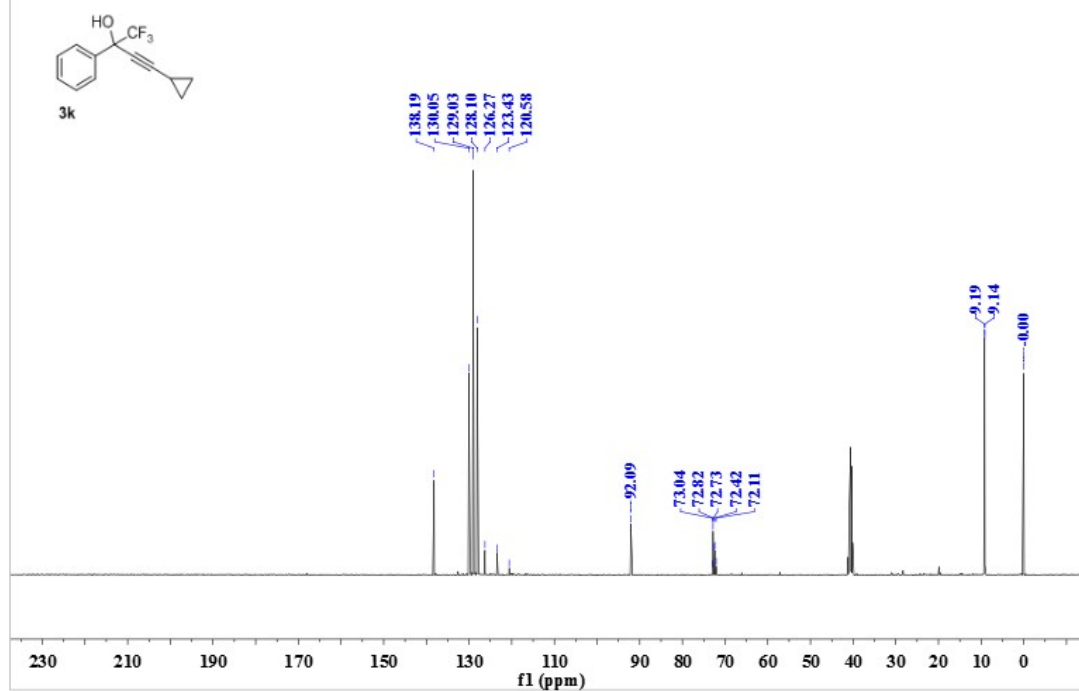

F19-4N-DMSO-20140619-maxiaowei-LN-122-shihezidaxue  
xinjiang daxue varian inova-400 19F-4N  
maxiaowei-LN-122-shihezidaxue  
in DMSO

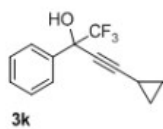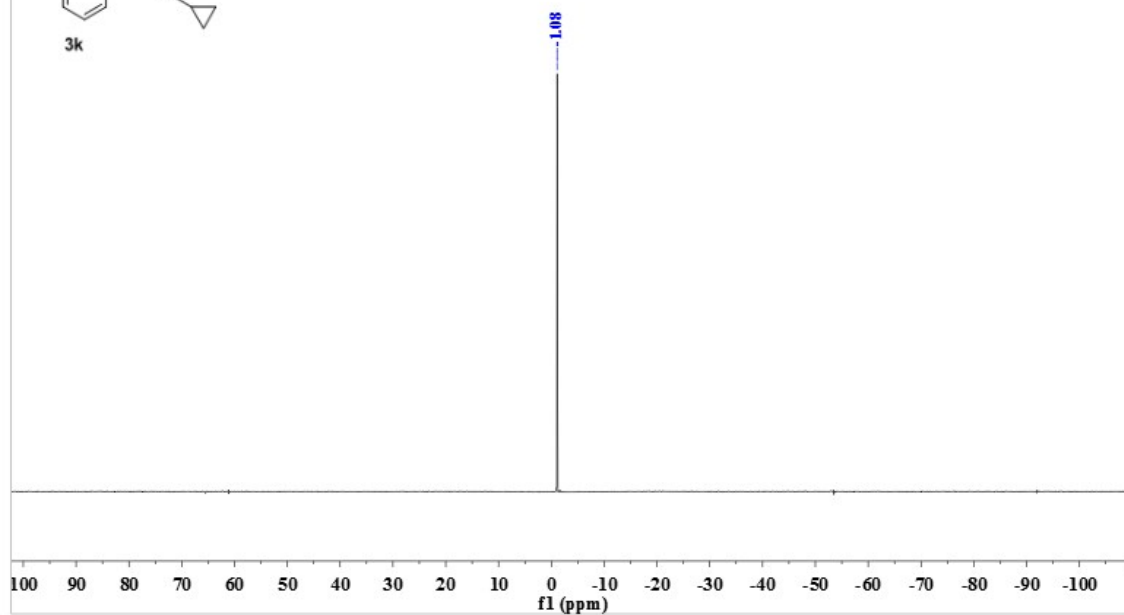

PROTON\_01  
XTRC VARIAN IN-400  
maxiaowei-LN-133\_h1 dmsc\_d6

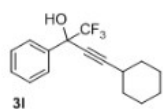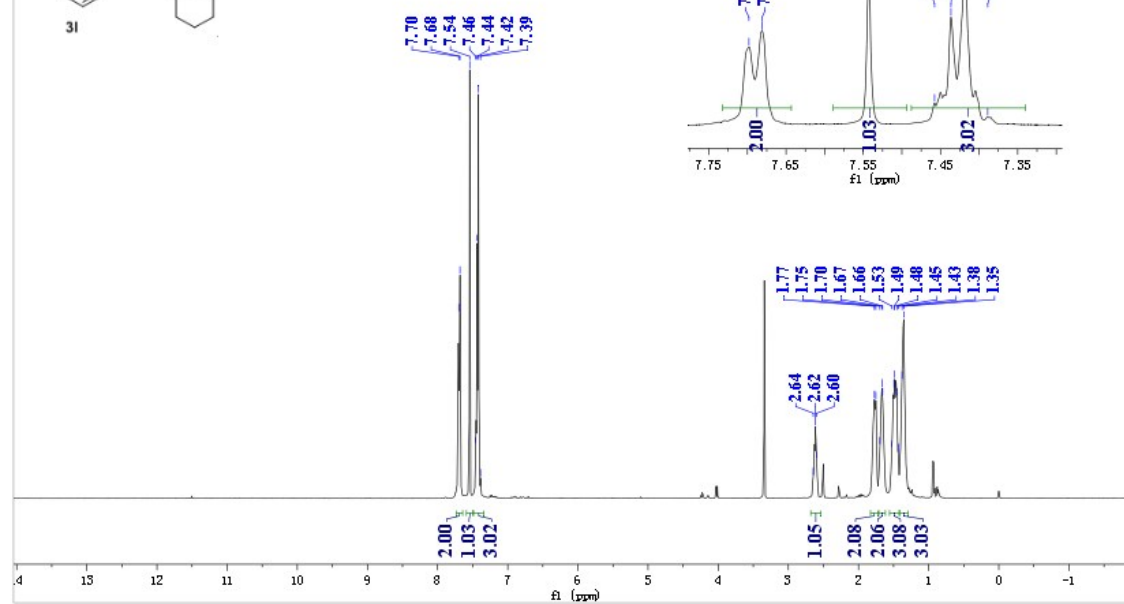

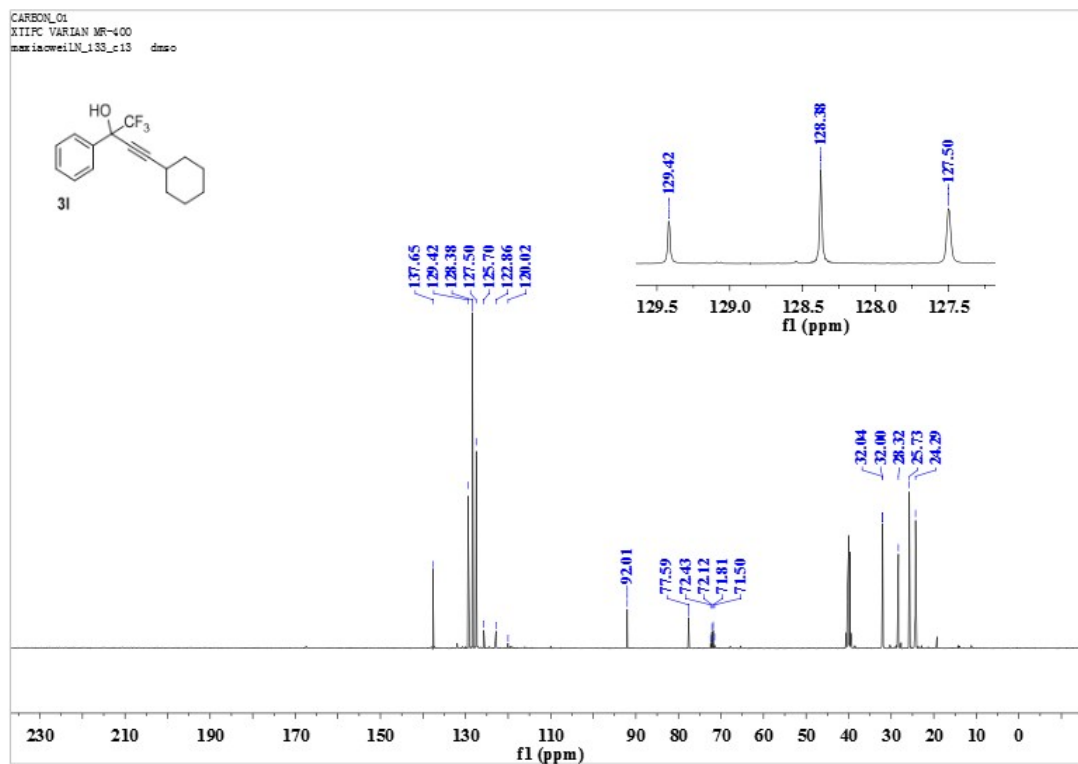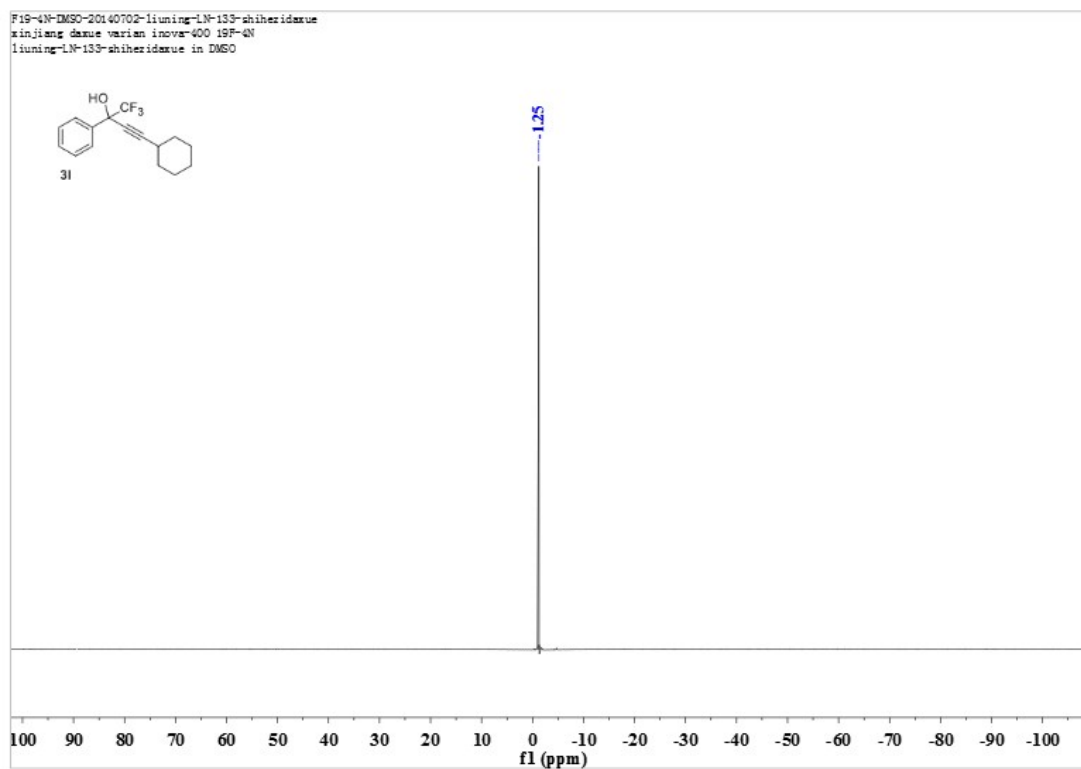

PROTON\_01  
 XTTC VARIAN MR-400  
 maxisowellN\_134\_h1 dmsd-d6

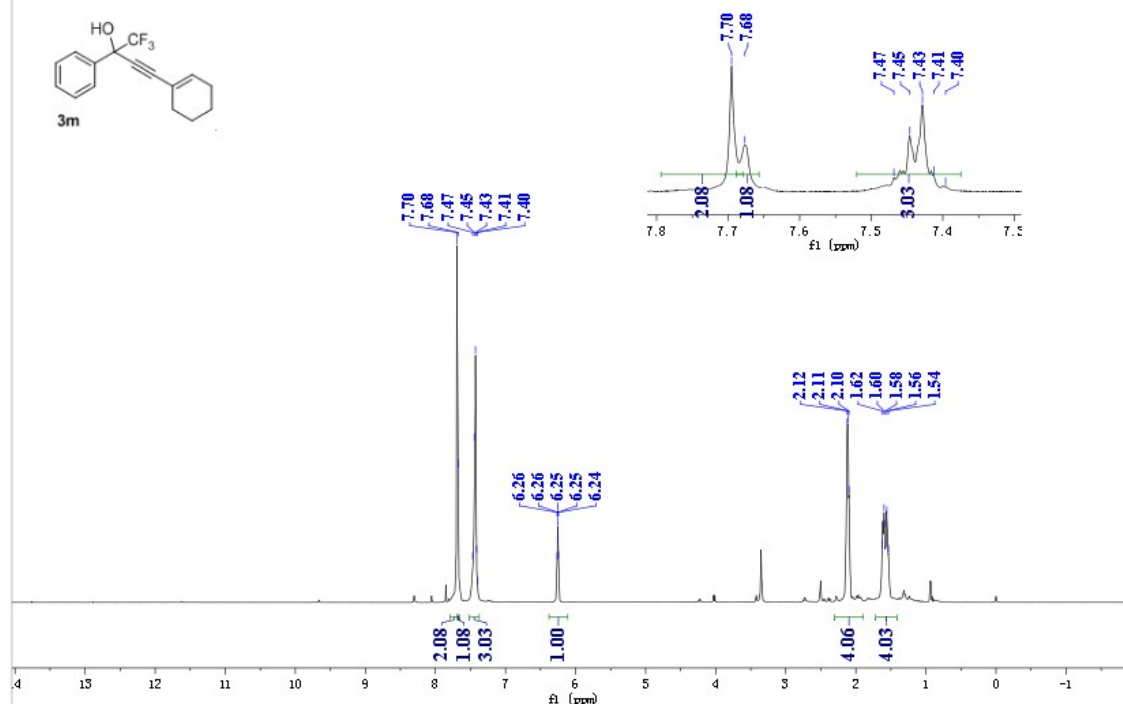

CARBON\_01  
 XTTC VARIAN MR-400  
 maxisowellN\_134\_c13 dmsd

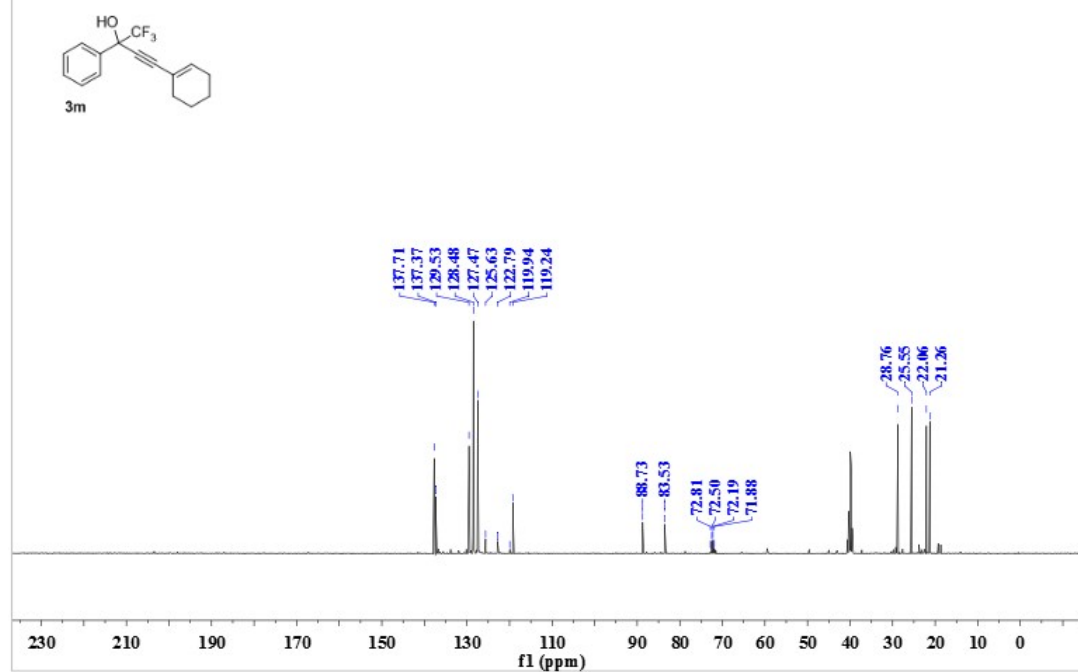

F19-4N-DMSO-20140702-liuning-LN-134-shiheridaxue  
xinjiang daxue varian innova-400 19F-QN  
liuning-LN-134-shiheridaxue in DMSO

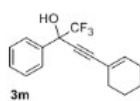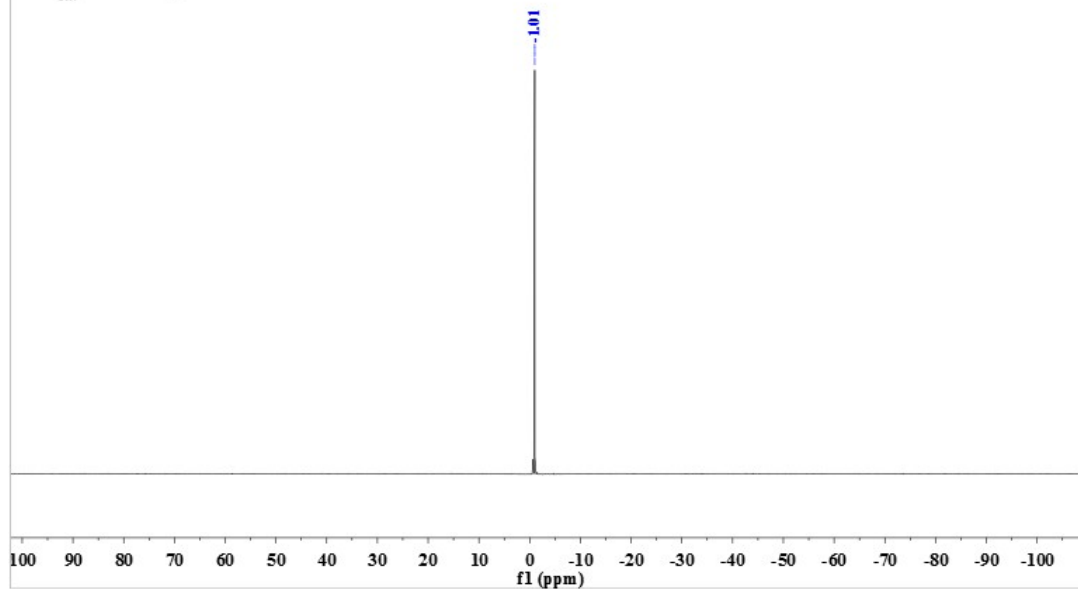

PROTON\_01  
XTEC VARIAN MR-400  
maximowellIN\_149\_h1 dmsO\_d5

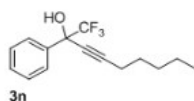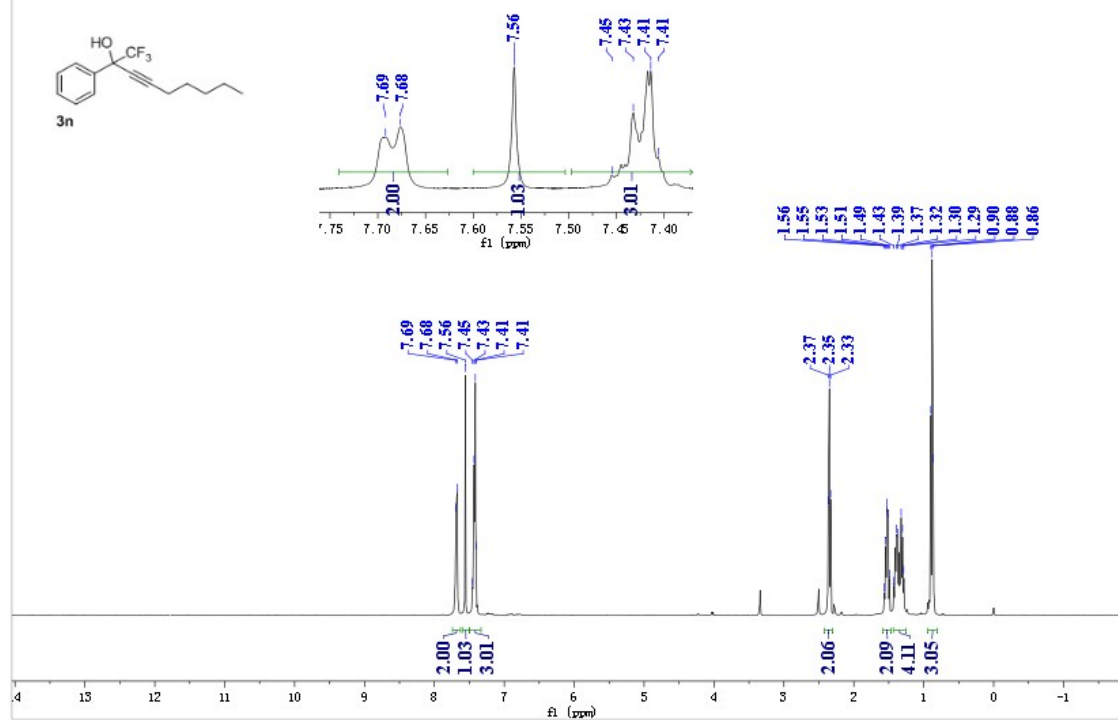

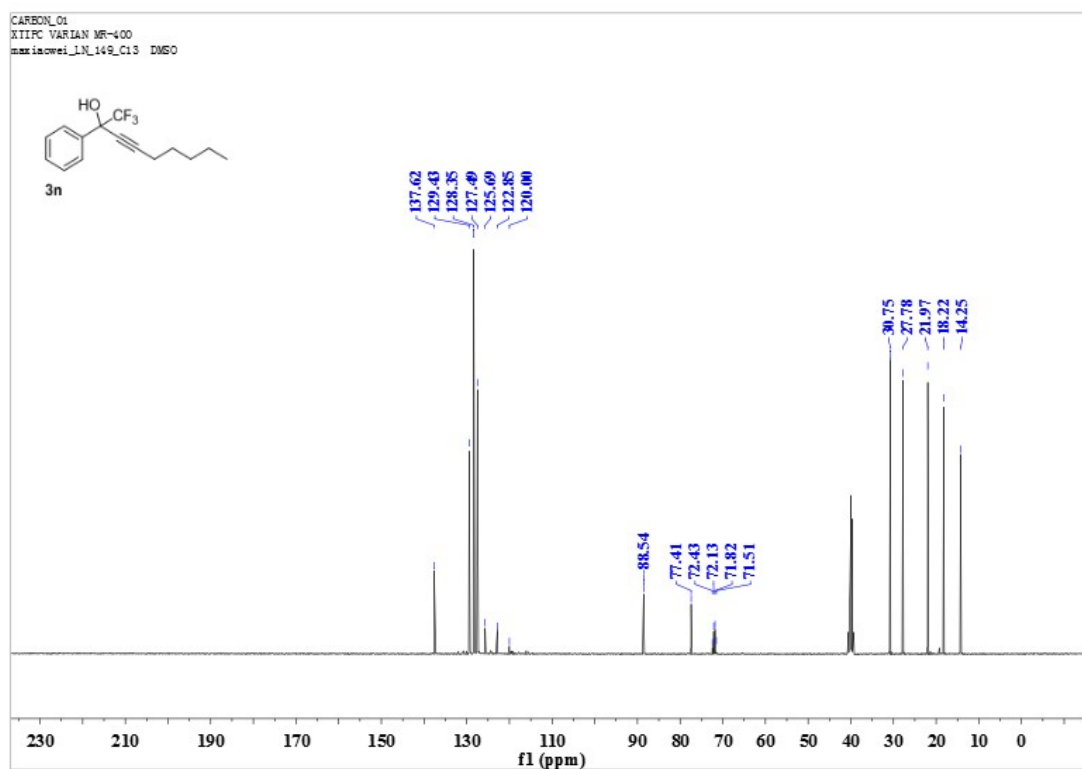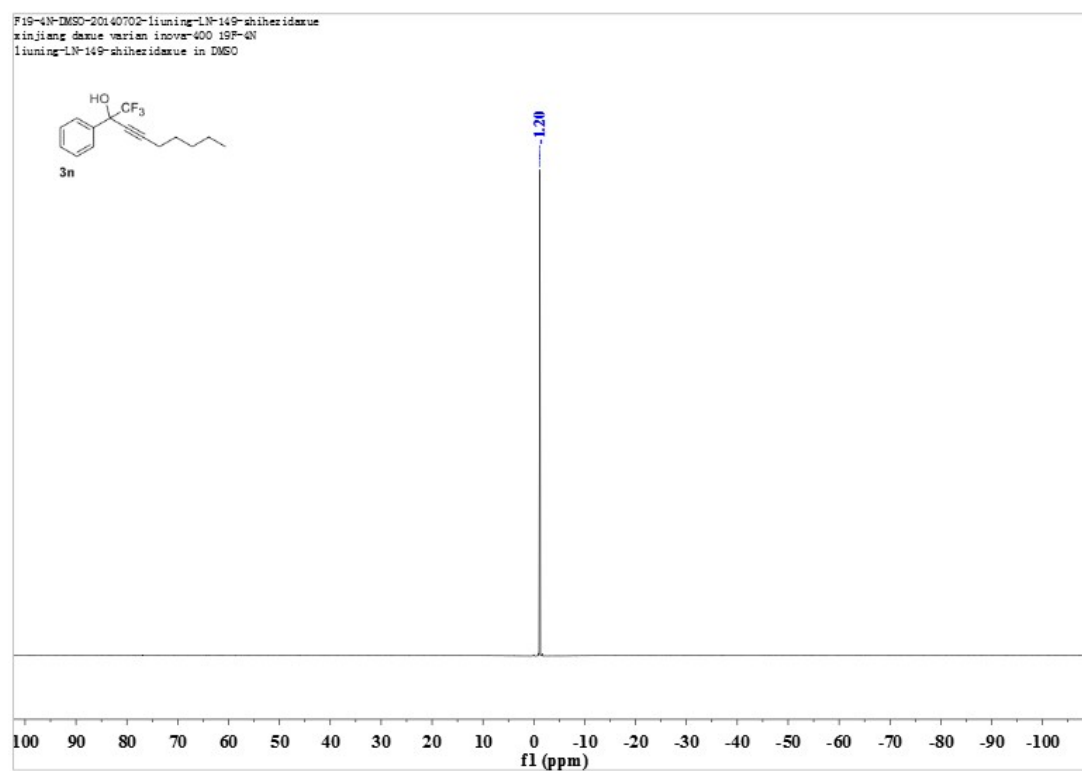

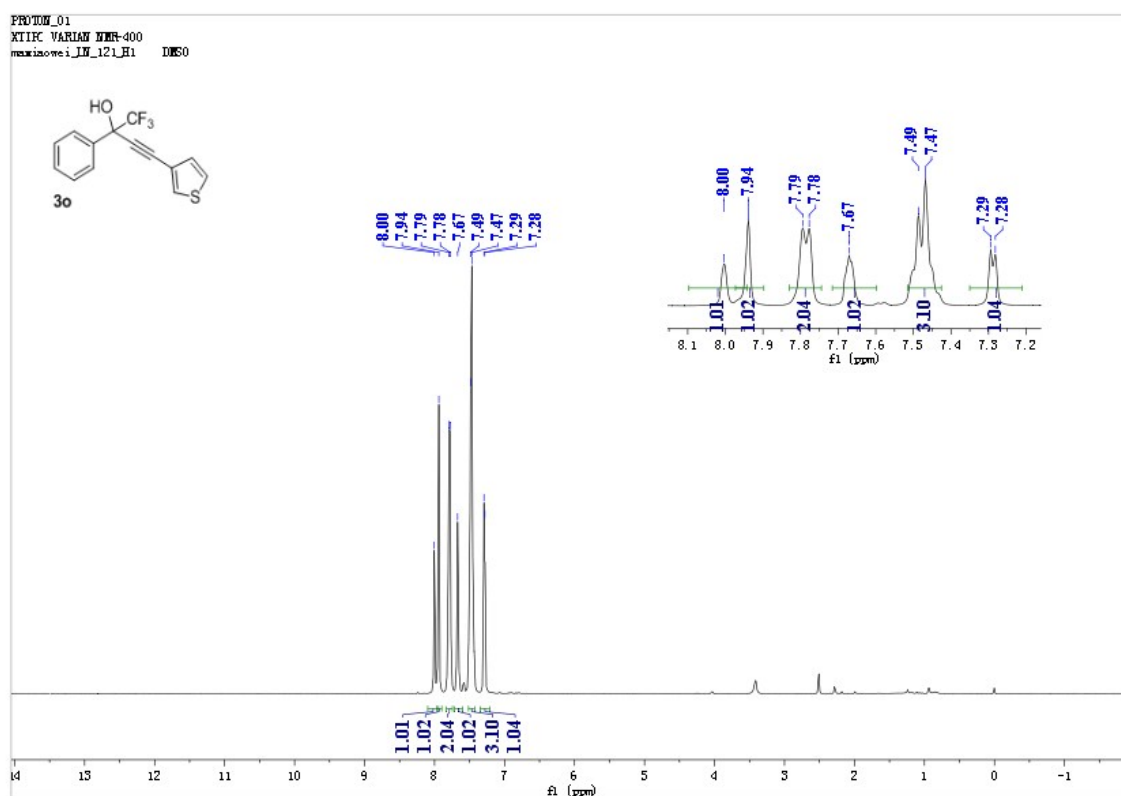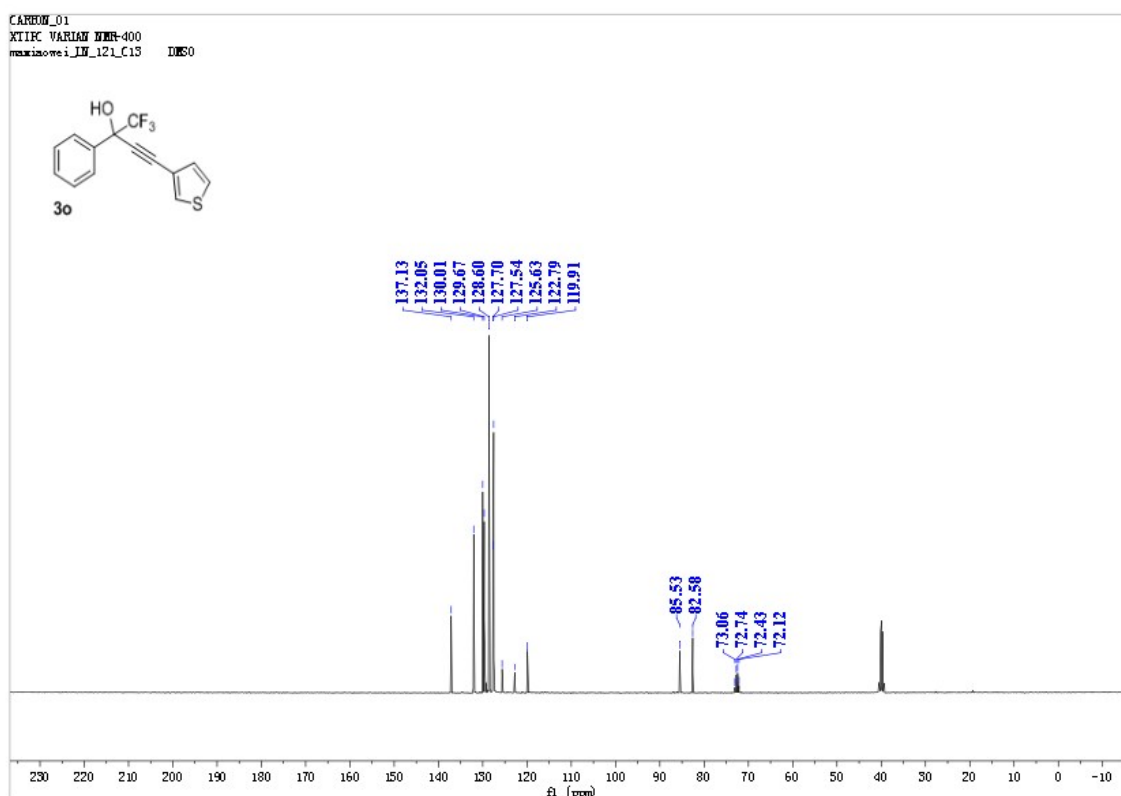

F19-4N-DMSO-20140619-maxiaowei-LN-121-shiheridanue  
xinjiang daxue varian inova-400 19F-4N  
maxiaowei-LN-121-shiheridanue  
in DMSO

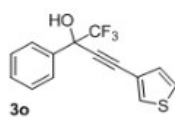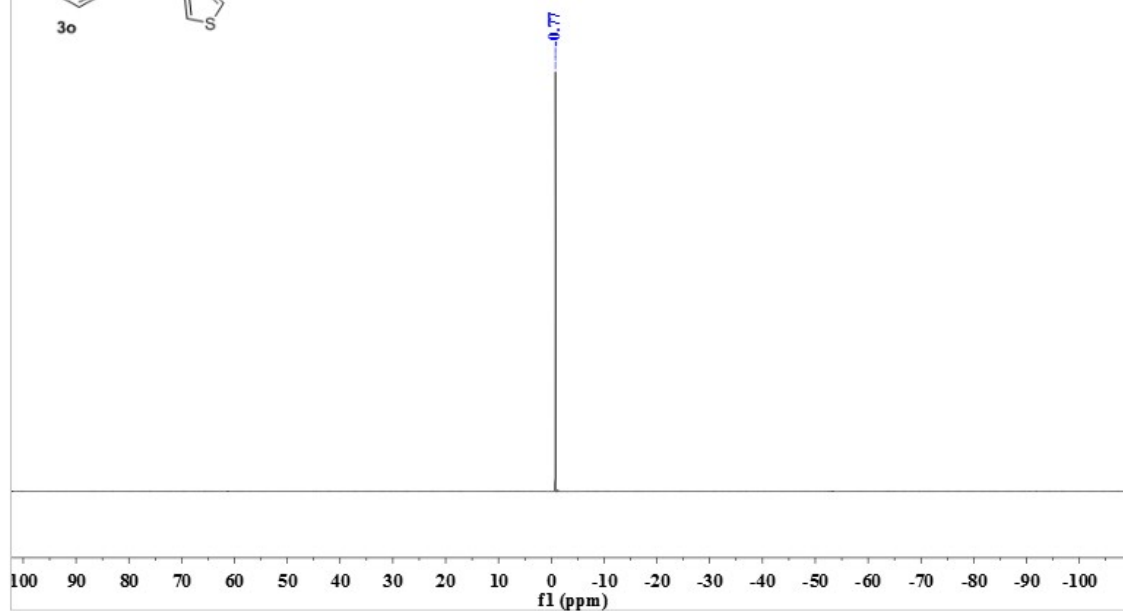

PROTON\_01  
XTEC VARIAN INOVA-400  
maxiaowei\_LN\_123\_H1 DMSO

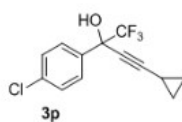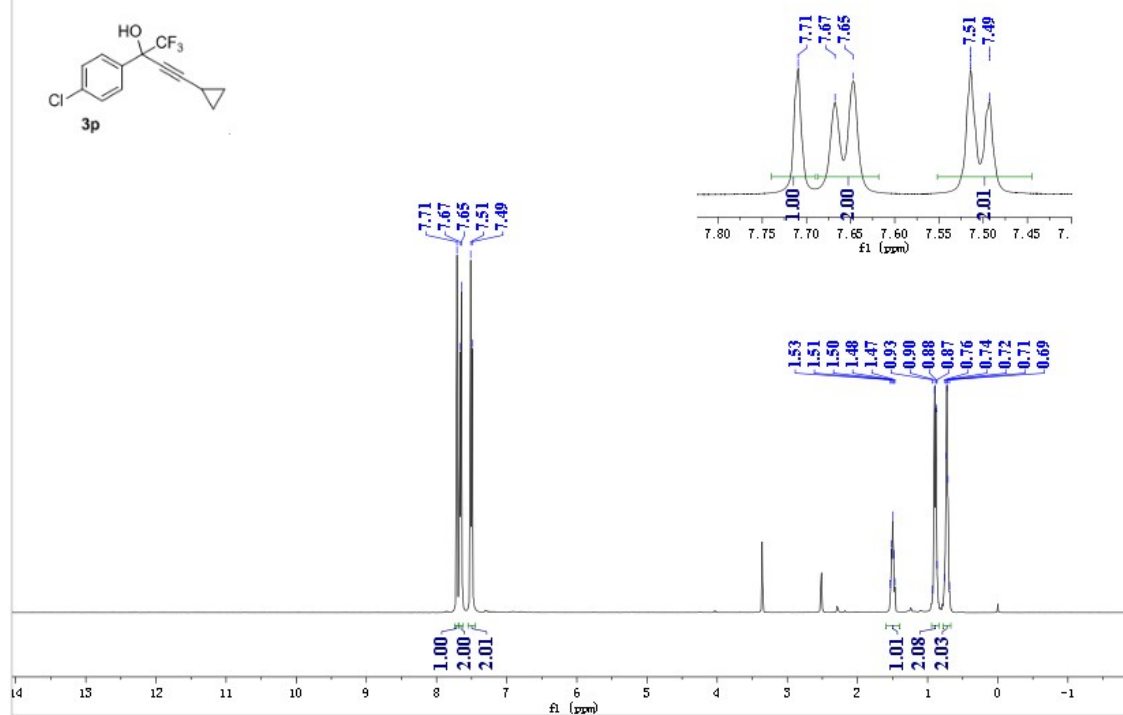

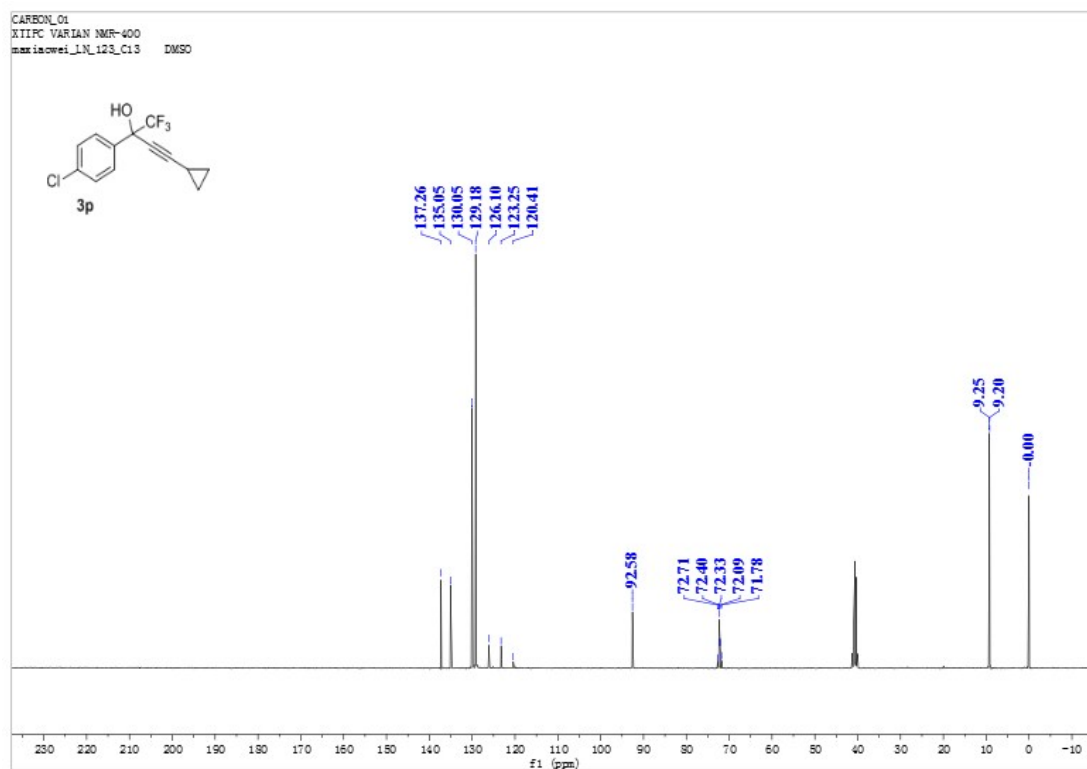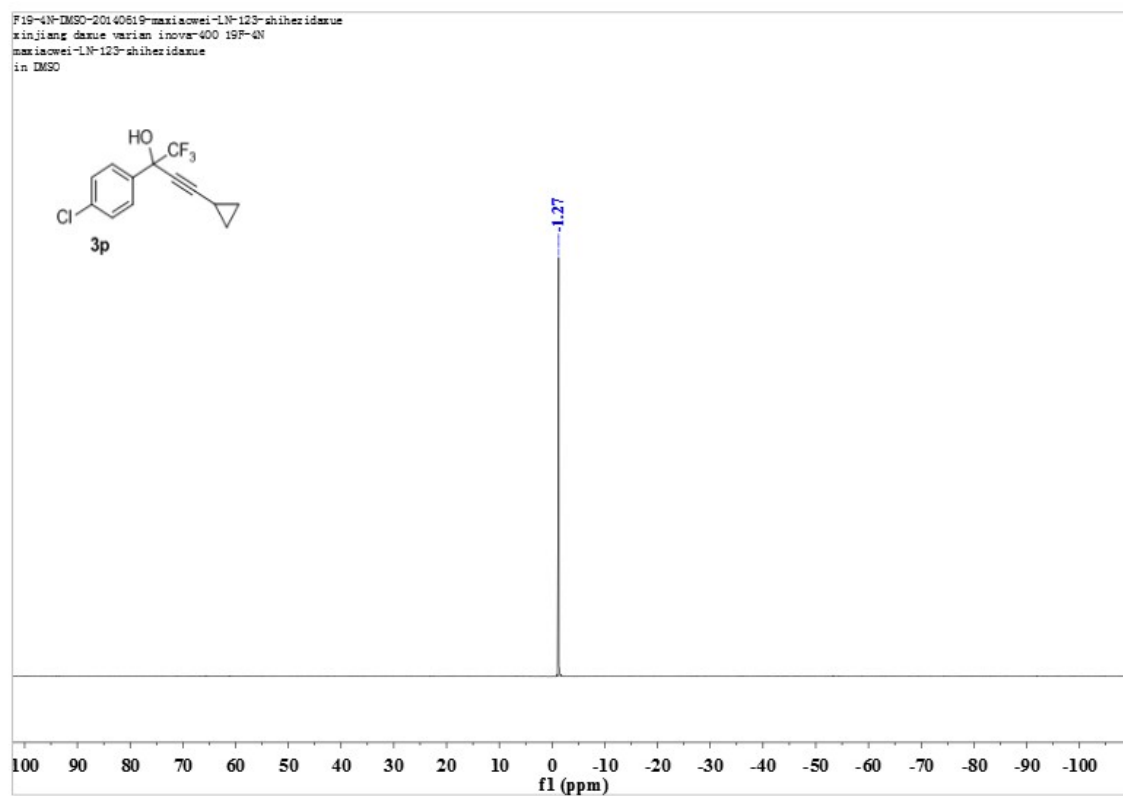

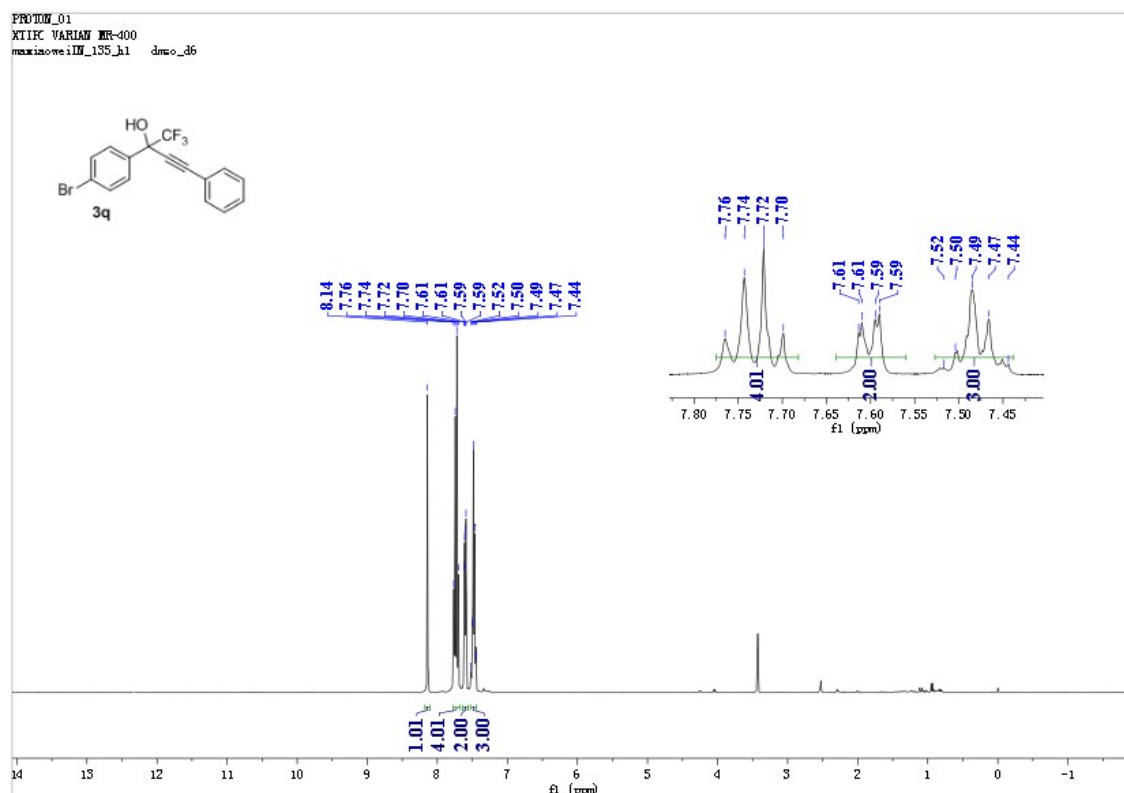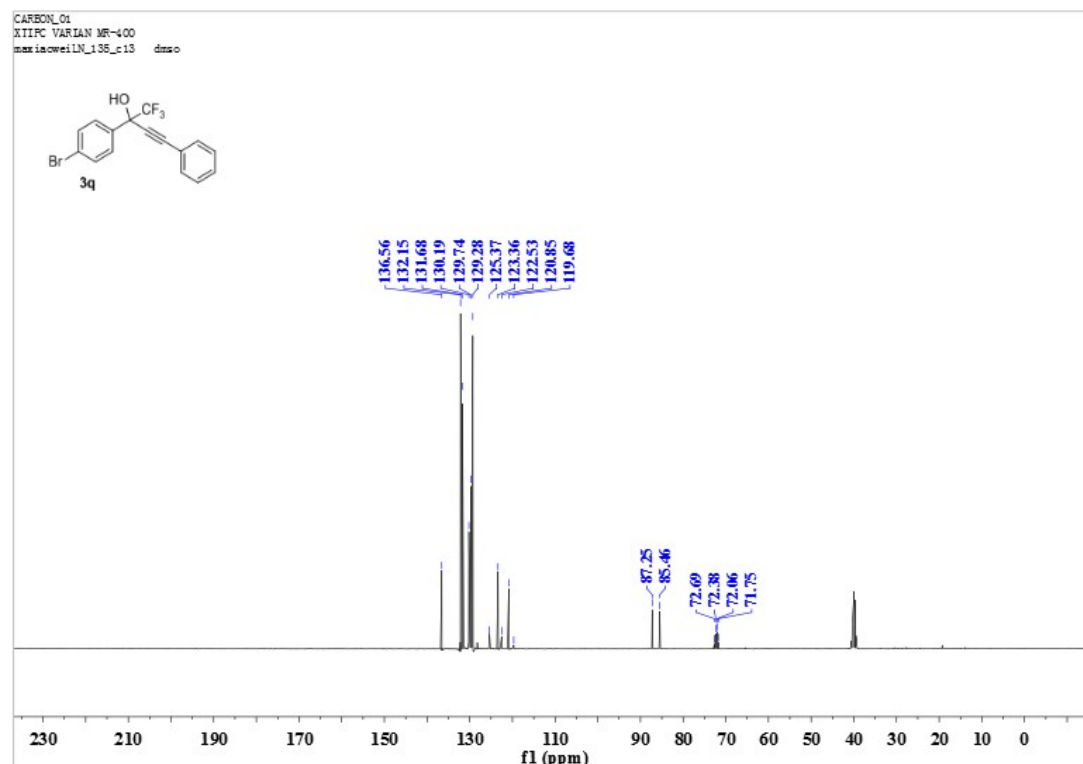

F19-4N-DMSO-20140702-liuning-LN-135-shiheridaxue  
xinjiang daxue varian inova-400 19F-4N  
liuning-LN-135-shiheridaxue in DMSO

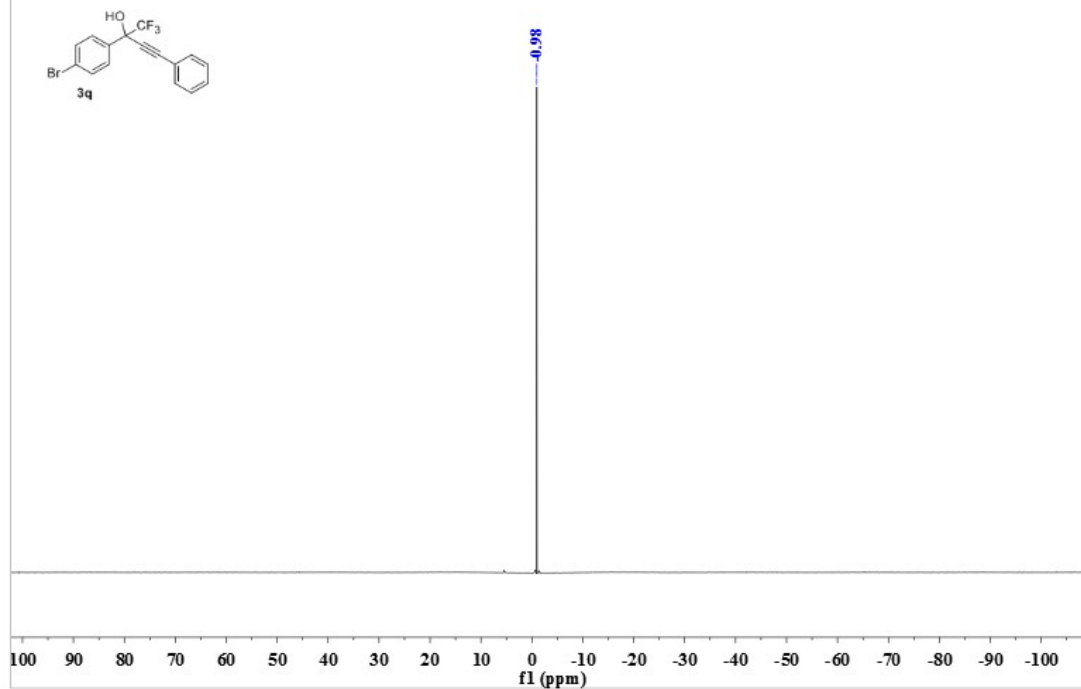

PROTON\_01  
XTRIC VARIAN MR-400  
maximowei111\_136\_h1 dms0\_36

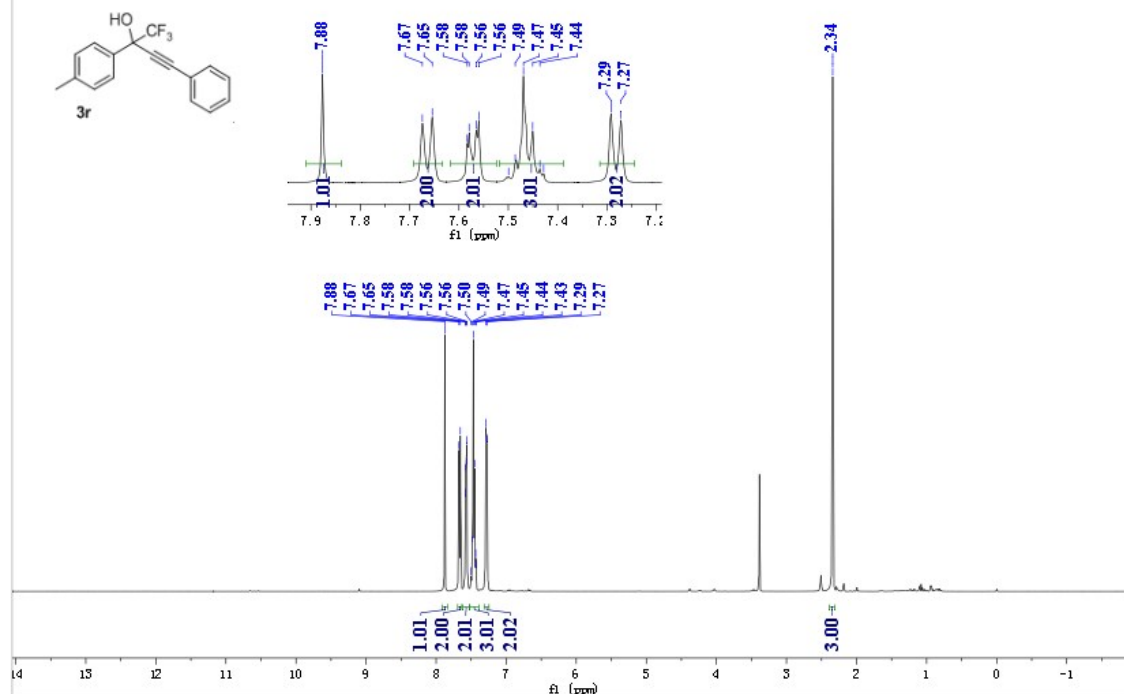

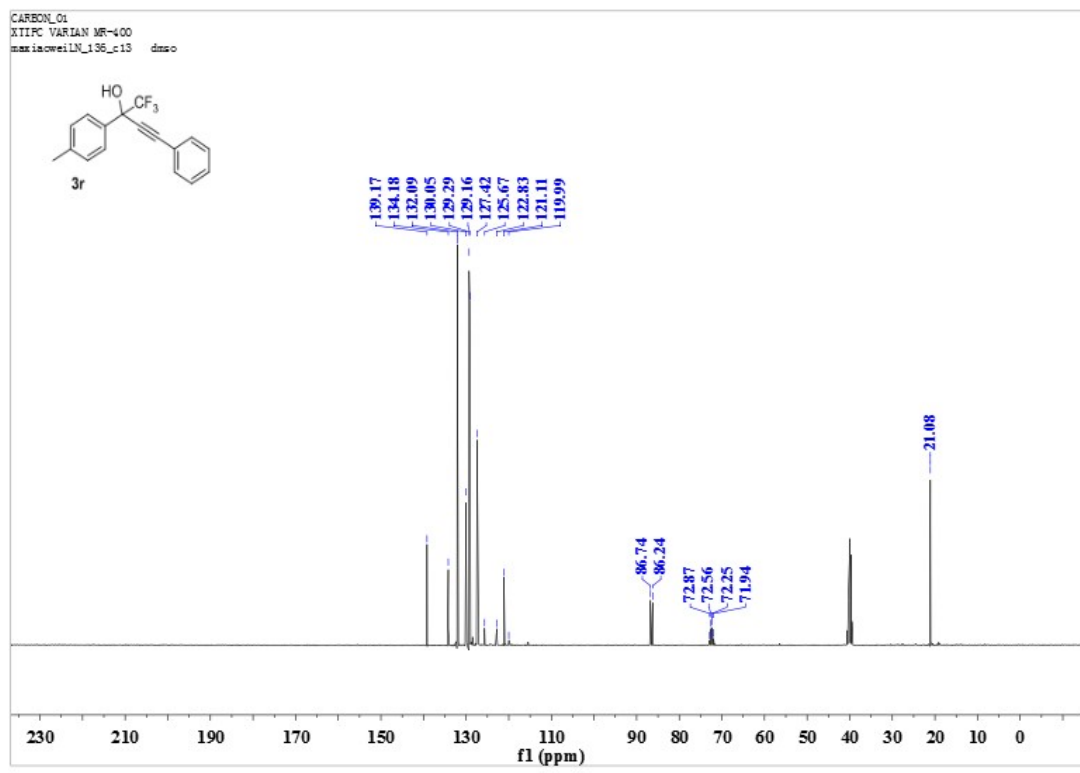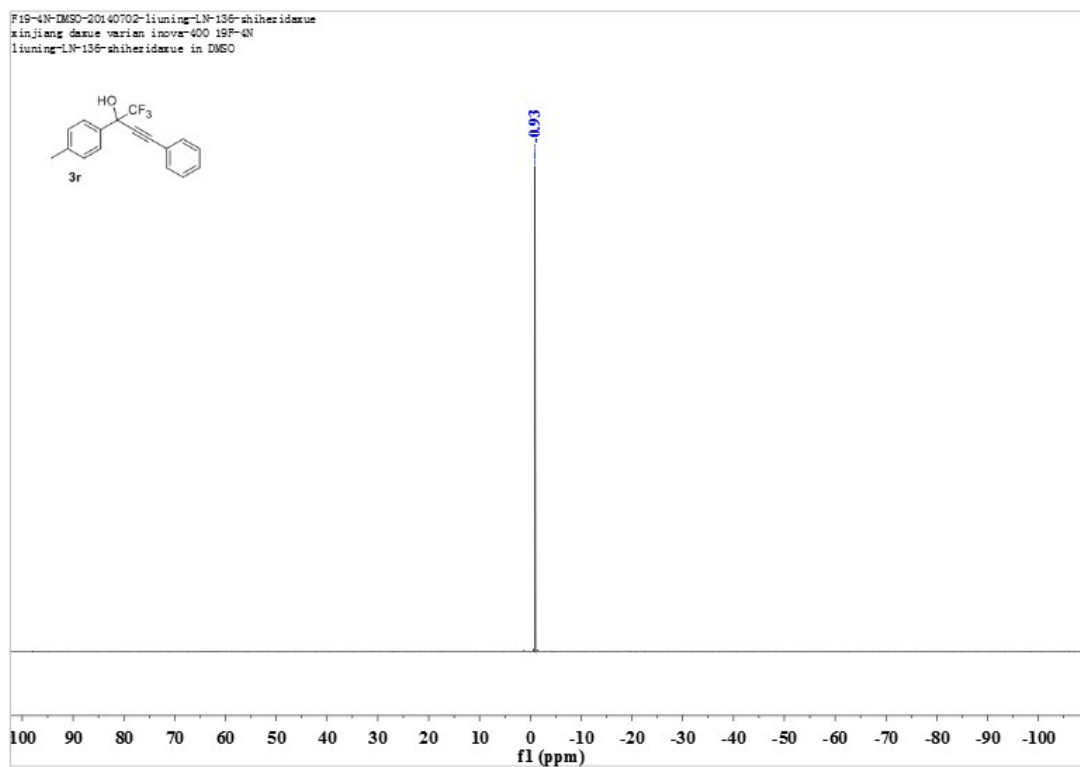

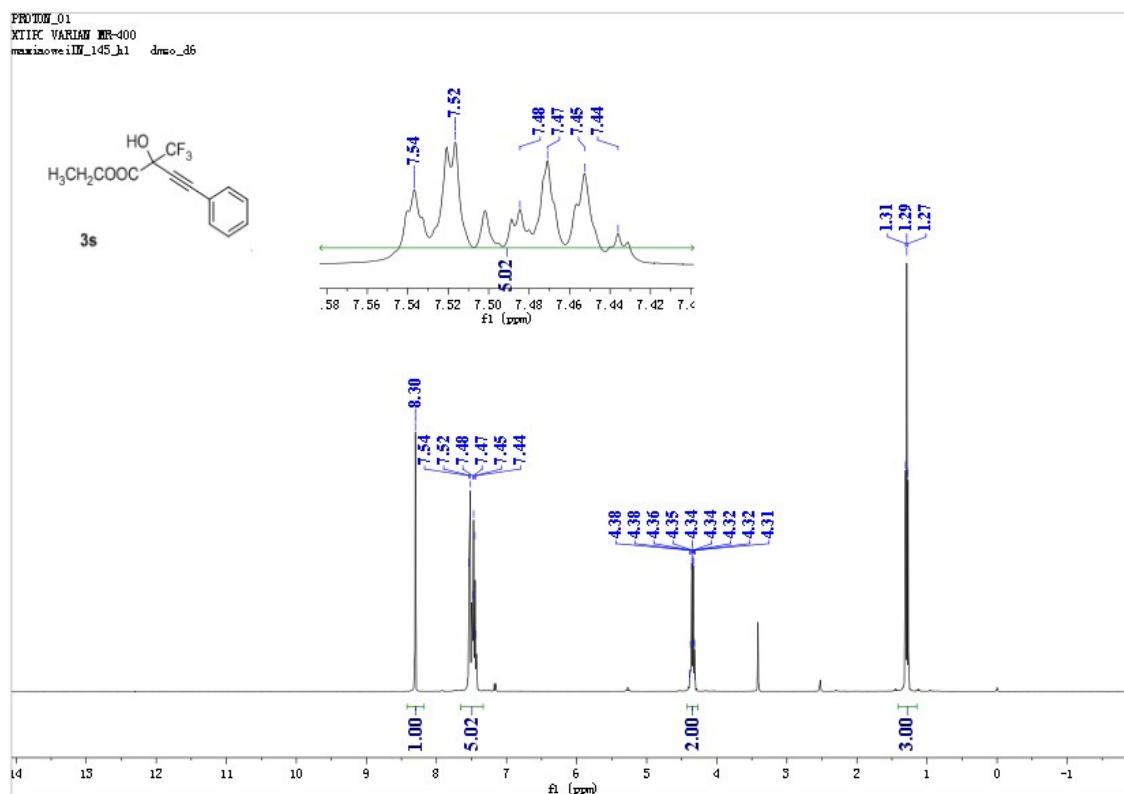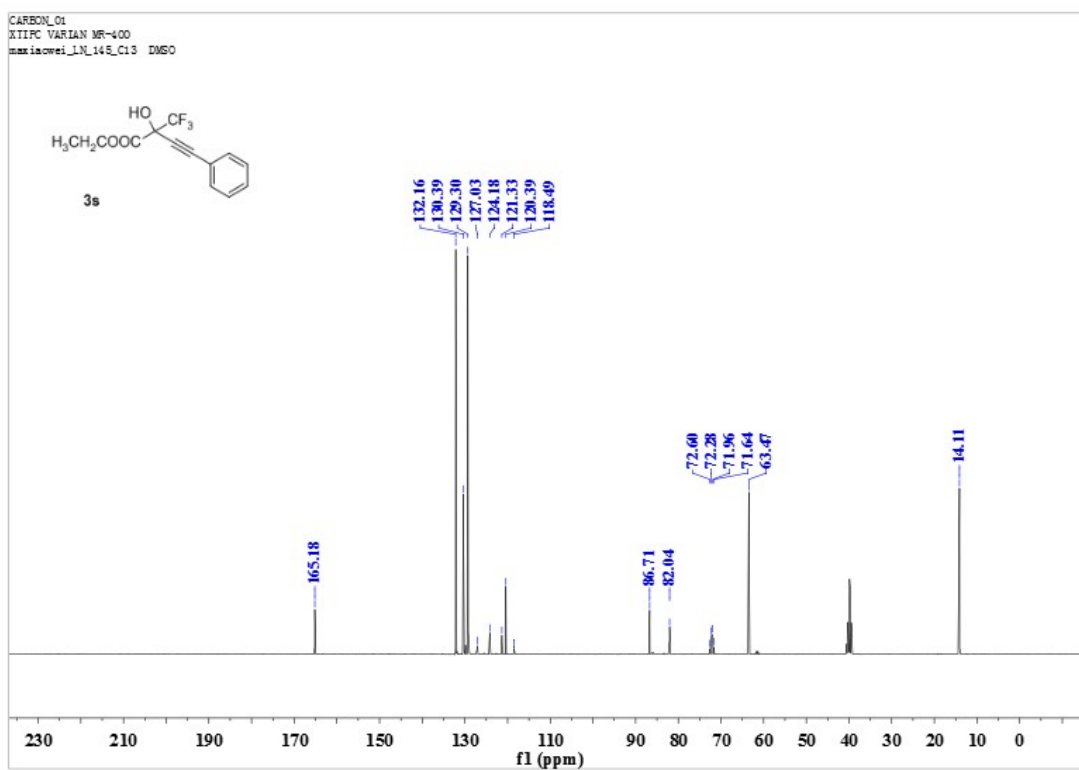

F18-VN-DMSO-20140702-liuning-LN-145-shiheridaxue  
xinjiang daxue varian innova-400 125P-4N  
liuning-LN-145-shiheridaxue in DMSO

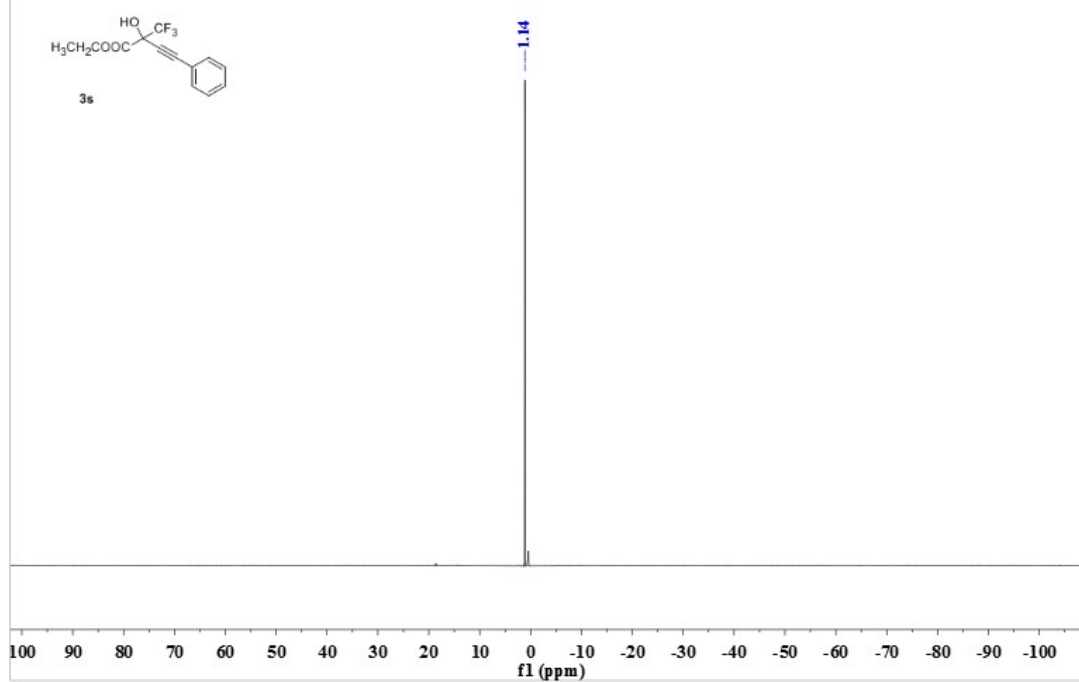

Supplement: c4ra14322a1.pdf [file c4ra14322a1.pdf]
